# Polymorphisms in the prostaglandin E<sub>2</sub> receptor subtype 2 gene confer susceptibility to aspirin-intolerant asthma: a candidate gene approach

Nobuyoshi Jinnai<sup>1</sup>, Takuro Sakagami<sup>1,2</sup>, Takashi Sekigawa<sup>1,2</sup>, Miho Kakiyama<sup>1</sup>, Toshiaki Nakajima<sup>1</sup>, Kenichi Yoshida<sup>1</sup>, Shin Goto<sup>1</sup>, Takashi Hasegawa<sup>2</sup>, Takeshi Koshino<sup>3</sup>, Yoshinori Hasegawa<sup>4</sup>, Hiromasa Inoue<sup>5</sup>, Naohito Suzuki<sup>6</sup>, Yasuyuki Sano<sup>6</sup> and Ituro Inoue<sup>1,\*</sup>

<sup>1</sup>Division of Genetic Diagnosis, The Institute of Medical Science, The University of Tokyo, Tokyo, Japan, <sup>2</sup>Division of Respiratory Medicine, Graduate School of Medical and Dental Sciences, Niigata University, Niigata, Japan, <sup>3</sup>Department of Respiratory Medicine, University of Tokyo, Graduate School of Medicine, Tokyo, Japan, <sup>4</sup>Department of Internal Medicine, School of Medicine, Nagoya University, Nagoya, Japan, <sup>5</sup>Research Institute for Diseases of the Chest, Faculty of Medicine, Kyushu University, Fukuoka, Japan and <sup>6</sup>Department of Allergy and Respiratory Medicine, Doai Memorial Hospital, Tokyo, Japan

Received September 1, 2004; Revised and Accepted October 11, 2004

**Aspirin-intolerant asthma (AIA) is a subtype of bronchial asthma characterized by development of bronchoconstriction evoked by non-steroidal anti-inflammatory drugs (NSAIDs). NSAIDs inhibit the cyclooxygenase pathway, leading to enhancement of the lipoxygenase pathway. We evaluated allelic association of 370 single nucleotide polymorphisms (SNPs) of 63 candidate genes, mostly from the arachidonic acid metabolic cascade, with AIA. After two rounds of screening with 198 AIA patients, multiple SNPs in the prostaglandin E<sub>2</sub> receptor subtype 2 (*EP2*) gene were associated with AIA ( $P < 0.05$ ). Among the 77 SNPs identified in the *EP2* gene, we selected 17 SNPs on the basis of linkage disequilibrium and allelic frequencies (minor allele frequency  $> 0.1$ ) for further association study. SNPs in the promoter region of the *EP2* gene, uS5, uS5b, and uS7, were significantly associated with AIA (permutation  $P = 0.039–0.001$ ). Analysis of haplotypes constructed according to the LD pattern showed a significant association with AIA (permutation  $P = 0.001$ ). The most significantly associated SNP, uS5, located in the regulatory region of the *EP2* gene, was in a STATs-binding consensus sequence [AIA 31.1% versus control 22.1% (permutation  $P = 0.0016$ ) or versus aspirin-tolerant asthma 22.2% (permutation  $P = 0.0017$ )]. Although STAT1 binding was not observed in gel mobility shift assay with HeLa nuclear extract, an unidentified protein was specifically bound to the allelic sequence. In *in vitro* reporter assay in HCT116 cells, the site containing the uS5 allele showed reduced transcription activity. Taken together, these results suggest that uS5 allele serves as a target of a transcription repressor protein. A functional SNP of the *EP2* gene associated with risk of AIA should decrease the transcription level, resulting in reduction of the PGE<sub>2</sub> braking mechanism of inflammation and involvement in the molecular mechanism underlying AIA.**

## INTRODUCTION

In a subset of asthmatic patients, aspirin and several other non-steroidal anti-inflammatory drugs (NSAIDs) that inhibit cyclooxygenase enzymes (COXs) induce severe asthmatic attack, generally termed aspirin-intolerant asthma (AIA) (1).

AIA constitutes 5–15% of asthmatic patients, and is more prevalent in women. AIA is usually more severe, has a later onset than allergic asthma and frequently is associated with nasal polyp or sinusitis. Despite the well-defined pharmacological trigger, the molecular pathogenesis underlying AIA is still obscure. The cyclooxygenase theory is the widely

\*To whom correspondence should be addressed at: Division of Genetic Diagnosis, The Institute of Medical Science, The University of Tokyo, 4-6-1 Shirokanedai, Minato-ku, Tokyo 108-8639, Japan. Tel: +81 354495325; Fax: +81 354495764; Email: ituro@ims.u-tokyo.ac.jp

accepted pathogenesis of AIA: a pharmacological action of NSAIDs, inhibition of COXs in the respiratory tract, alters arachidonic acid metabolism in AIA patients (2–4). Thus, aspirin and most other NSAIDs lead to a decrease in the level of PGE<sub>2</sub>, an anti-inflammatory PG generated as one of the various oxygenated metabolites in the COX pathway, which increases the number of cysteinyl leukotrienes (cys-LTs) that can mediate bronchoconstriction, mucus secretion, vascular permeability, cellular infiltration and eosinophil survival (5–7). An imbalance toward the lipoxygenase (LO) pathway is thought to play a role in accelerating the inflammation reaction in the airway tract. Although AIA is precipitated by inhibition of the COX pathway, it remains unclear why a similar adverse reaction to NSAIDs is not seen in patients with aspirin tolerant asthma (ATA) or in healthy individuals.

There is moderate genetic background in AIA; the European Network on Aspirin-Induced Asthma found that 5.1% of 365 AIA patients had family history of aspirin sensitivity (8). A polymorphism in the promoter of LTC<sub>4</sub> synthase, A-444C single nucleotide polymorphism (SNP), has been reported to be associated with AIA in Polish patients (9,10). However, conflicting results were reported in US and Japanese populations (11,12). A recent report showed that a haplotype of the 5-LO gene was weakly associated with AIA in Korean population (13). In the present study, an extensive candidate gene analysis was applied to identify susceptibilities to AIA. On the basis of the well-defined pharmacological actions of NSAIDs, 63 candidate genes for AIA were catalogued and screened for allelic association study in a total of 198 AIA patients. The 833 SNPs of 63 candidate genes were initially identified; 370 SNPs were selected on the basis of linkage disequilibrium and allelic frequency, and evaluated for allelic association with AIA. SNPs in the prostaglandin E<sub>2</sub> receptor subtype 2 (*EP2*) gene were found to be significantly associated with AIA, and the functional impact of a promoter variant was further investigated.

## RESULTS

### Screening of candidate genes for AIA

On the basis of the pharmacological actions of NSAIDs and the bronchial hyper-responsiveness of AIA, 63 candidate genes were selected for evaluation of association with AIA as follows: 43 genes from the arachidonic acid metabolic cascade, such as LOs, COXs, various leukotriene (LT) and PG synthases and receptors acting on the LO- and COX-pathways, and 20 genes from the immune system and other factors likely to be involved in asthma such as lymphokines, transcription factors of immune cells, matrix metalloproteinases and the platelet activating factor pathway (summarized in Table 1). The 833 SNPs of 63 genes, identified from the public database or by direct sequencing, were genotyped in 96 control subjects; among these, 370 SNPs with minor allele frequency >0.1 or location in the coding region were genotyped for the first screening (Table 1). Distributions of allele frequency of the SNPs were compared in 87 patients with AIA, 192 with ATA [96 atopic asthmatic (AT) and 96

non-atopic asthmatic (NAT) patients] and 96 with non-asthmatic controls (CTR) by a simple chi-square test. Forty-nine SNPs in 15 genes were associated with AIA in comparison with CTR in the first screening ( $P < 0.05$ ). Fifteen SNPs in five genes showed significant differences in allele frequencies in comparisons of both AIA with ATA and AIA with CTR (data not shown).

All the subjects including the individuals in the first screening, 198 AIA, 282 ATA and 274 CTR, were then subjected to genotyping of the 49 SNPs. After increasing the sample size, the association results of most of the SNPs tested by permutation analysis with 10 000 iterations were weakened or disappeared (data not shown), except for the SNPs of *EP2* gene. SNPs uS7, S3, S4 and S5 of *EP2* gene demonstrated significant associations with AIA in comparison with ATA or with CTR (Table 2). In the second screening, uS7 showed the most significant association in both comparisons of AIA with ATA (permutation  $P = 0.0025$ ) and AIA with CTR (permutation  $P = 0.039$ ).

### Linkage disequilibrium mapping of *EP2* gene

As multiple SNPs of the *EP2* gene were associated with AIA, extensive screening of *EP2* was undertaken. We identified 77 SNPs covering the entire gene and the regions spanning 35 kb upstream of exon 1 and 43 kb downstream of exon 2 (Fig. 1). The 77 SNPs were categorized into 24 subgroups on the basis of genotype identity after genotyping 12 individuals; SNPs expected to be in tight LD (assuming  $r^2$ -LD) were grouped together (Fig. 1). Twenty-four representative SNPs of subgroups uS1–uS10, S1–S10 and dS1–dS4 were genotyped in all the patients and controls, and pair-wise linkage disequilibrium was estimated. A highly structured LD pattern, a major LD block structure ( $|D'| > 0.7$ ) covered by uS5–S10 and two minor LD blocks covered by uS1–uS4 and dS1–dS4, were observed (Fig. 2A). SNPs uS5–uS10, S1–S10, and dS1, associated with AIA in the second screening, were located in the major LD block. The 17 SNPs representing the major LD block then were evaluated for association with AIA by genotyping the AIA patients. SNPs in the major LD block were evaluated by  $r^2$ -statistic, and weak LD was observed (Fig. 2A). In addition to SNPs uS7, S3, S4 and S5, significant associations also were observed for uS5 and uS10 using simple chi-square test and permutation test (Table 2). The minor allele frequency of uS5 was 31.1% for AIA, 22.1% for CTR and 22.2% for ATA, showing significant association (AIA versus CTR:  $\chi^2 = 9.67$ ,  $P = 0.0019$ , permutation  $P = 0.0016$ ; AIA versus ATA:  $\chi^2 = 9.61$ ,  $P = 0.0019$ , permutation  $P = 0.0017$ ) (Table 2).

### UPGMA-based 'LD tree' and haplotype analysis

A UPGMA (unweighted pair-group method using arithmetic averages)-based 'LD tree' was developed as a tool for visual inspection of subgroupings of SNPs on the basis of LD structure as described in Materials and Methods (Fig. 2B), and subsequently applied to haplotype analysis. UPGMA is a method for designing a diagram to compare the sequence

Table 1. SNPs applied to the first screening

| No. | Gene           | SNP        | Sequence position | Variation | Localization                  | rs ID     | Minor allele frequencies (96 CTR) |
|-----|----------------|------------|-------------------|-----------|-------------------------------|-----------|-----------------------------------|
| 1   | <i>ADAM33</i>  | ADAM33S1   | 11 513            | C/A       | Intron19                      | rs44707   | 0.467                             |
| 2   |                | ADAM33S2   | 12 505            | T/C       | Exon20-non-synonymous (M764T) | rs2280091 | 0.098                             |
| 3   |                | ADAM33S3   | 12 534            | T/C       | Exon20-non-synonymous (M774S) | rs2280090 | 0.102                             |
| 4   |                | ADAM33S4   | 12 612            | T/C       | Intron20                      | rs2280089 | 0.092                             |
| 5   |                | ADAM33S5   | 13 018            | G/A       | Intron21                      | rs628977  | 0.362                             |
| 6   |                | ADAM33S6   | 13 026            | T/C       | Intron21                      | rs628965  | 0.362                             |
| 7   |                | ADAM33S7   | 13 060            | A/C       | Intron21                      | rs543749  | 0.181                             |
| 8   | <i>ALOX12B</i> | ALOX12BS1  | 1963              | G/A       | Intron2                       | rs3027303 | 0.189                             |
| 9   |                | ALOX12BS4  | 3276              | G/T       | Intron2                       | rs3027294 | 0.391                             |
| 10  |                | ALOX12BS5  | 7053              | G/C       | Intron4                       | rs2304908 | 0.392                             |
| 11  |                | ALOX12BS6  | 7223              | C/T       | Intron4                       | rs2304907 | 0.396                             |
| 12  |                | ALOX12BS7  | 7341              | C/T       | Intron4                       | rs2304906 | 0.130                             |
| 13  |                | ALOX5S1    | 9223              | A/G       | Intron2                       | rs4769060 | 0.151                             |
| 14  |                | ALOX5S2    | 26 904            | G/A       | Intron3                       | New       | 0.401                             |
| 15  | <i>ALOX5</i>   | ALOX5S3    | 50 760            | G/A       | Intron4                       | New       | 0.198                             |
| 16  |                | ALOX5S4    | 59 443            | A/G       | Intron6                       | New       | 0.193                             |
| 17  |                | ALOX5S5    | 69 751            | G/C       | Intron7                       | New       | 0.354                             |
| 18  | <i>CLP</i>     | CLPS1      | 1152              | G/A       | Intron2                       | rs2966305 | 0.401                             |
| 19  |                | CLPS2      | 3607              | C/A       | Intron2                       | New       | 0.032                             |
| 20  |                | CLPS3      | 3688              | A/G       | Intron2                       | rs2967871 | 0.315                             |
| 21  |                | CLPS4      | 9097              | C/T       | Intron2                       | rs2925050 | 0.495                             |
| 22  |                | CLPS5      | 9197              | T/G       | Intron2                       | New       | 0.457                             |
| 23  |                | CLPS6      | 11 744            | T/C       | Intron2                       | rs1835156 | 0.333                             |
| 24  |                | CLPS7      | 17 612            | T/C       | Intron2                       | New       | 0.229                             |
| 25  |                | CLPS8      | 17 865            | G/C       | Intron2                       | New       | 0.356                             |
| 26  |                | CLPS9      | 17 923            | G/C       | Intron2                       | rs2967876 | 0.284                             |
| 27  |                | CLPS10     | 20 308            | C/T       | Intron2                       | rs2925064 | 0.263                             |
| 28  |                | CLPS11     | 20 380            | T/C       | Intron2                       | rs934166  | 0.468                             |
| 29  |                | CLPS12     | 20 412            | G/A       | Intron2                       | rs201854  | 0.447                             |
| 30  |                | CLPS13     | 23 054            | T/C       | Intron2                       | New       | 0.104                             |
| 31  |                | CLPS17     | 27 698            | A/G       | Intron2                       | rs2288584 | 0.250                             |
| 32  |                | CLPS18     | 31 174            | T/C       | Intron3                       | rs2967855 | 0.283                             |
| 33  |                | CLPS19     | 31 262            | C/G       | Intron3                       | New       | 0.214                             |
| 34  |                | CLPS20     | 31 615            | C/T       | Intron3                       | New       | 0.208                             |
| 35  |                | CLPS21     | 43 186            | A/T       | Intron3                       | rs2914823 | 0.185                             |
| 36  |                | CLPS22     | 43 360            | T/G       | Intron3                       | New       | 0.404                             |
| 37  |                | CLPS23     | 43 394            | A/G       | Intron3                       | New       | 0.250                             |
| 38  |                | CLPS24     | 47 961            | G/A       | Intron3                       | New       | 0.116                             |
| 39  |                | CLPS25     | 48 577            | C/T       | Intron3                       | New       | 0.347                             |
| 40  |                | CLPS26     | 51 794            | C/T       | Exon4-UTR                     | rs247862  | 0.297                             |
| 41  | <i>CNOT3</i>   | CNOT3S1    | 328               | C/T       | Intron1                       | rs42318   | 0.115                             |
| 42  |                | CTSGS1     | 308               | G/A       | Intron1                       | rs2236742 | 0.212                             |
| 43  | <i>CTSG</i>    | CTSGS2     | 527               | A/G       | Intron1                       | New       | 0.034                             |
| 44  |                | CTSGS3     | 726               | A/G       | Intron1                       | rs1957523 | 0.477                             |
| 45  |                | CTSGS4     | 1226              | C/T       | Intron2                       | New       | 0.034                             |
| 46  |                | CTSGS5     | 1349              | G/A       | Intron2                       | rs2070697 | 0.314                             |
| 47  |                | CTSGS6     | 1767              | A/G       | Exon4-synonymous              | New       | 0.182                             |
| 48  | <i>CYP4F2</i>  | CYP4F2S1   | 4937              | A/T       | Intron1                       | New       | 0.349                             |
| 49  |                | CYP4F2S4   | 18 733            | T/C       | Intron1                       | rs2072269 | 0.335                             |
| 50  |                | CYP4F2S5   | 18 810            | G/C       | Intron1                       | rs1064796 | 0.495                             |
| 51  |                | CYP4F2S6   | 30 715            | G/A       | Intron1                       | rs2018460 | 0.170                             |
| 52  | <i>CYP4F3</i>  | CYP4F3S0   | 3187              | G/A       | Intron2                       | rs2203998 | 0.328                             |
| 53  |                | CYP4F3S0.5 | 6221              | C/T       | Intron4                       | rs1290626 | 0.141                             |
| 54  |                | CYP4F3S1   | 8507              | C/T       | Intron6                       | rs2283612 | 0.189                             |
| 55  |                | CYP4F3S2   | 11 871            | A/C       | Intron8                       | rs2733750 | 0.183                             |
| 56  |                | CYP4F3S3   | 12 015            | A/G       | Exon9-synonymous              | New       | 0.363                             |
| 57  |                | CYP4F3S4   | 12 808            | G/A       | Intron9                       | rs2733752 | 0.136                             |
| 58  |                | CYP4F3S5   | 12 877            | T/A       | Intron9                       | New       | 0.140                             |
| 59  | <i>CYP4F8</i>  | CYP4F3S6   | 17 772            | T/C       | Intron11                      | New       | 0.453                             |
| 60  |                | CYP4F8S1   | 3610              | C/T       | Intron2                       | rs2072599 | 0.168                             |
| 61  |                | CYP4F8S2   | 6771              | G/T       | Intron5                       | rs2072601 | 0.276                             |
| 62  |                | CYP4F8S3   | 13 568            | C/T       | Intron11                      | rs2239366 | 0.276                             |

Continued

Table 1. Continued

| No. | Gene           | SNP        | Sequence position | Variation | Localization                 | rs ID      | Minor allele frequencies (96 CTR) |
|-----|----------------|------------|-------------------|-----------|------------------------------|------------|-----------------------------------|
| 63  | <i>CYSLT1R</i> | CYSLT1RS1  | 927               | C/T       | Exon1-synonymous             | rs320995   | 0.474                             |
| 64  | <i>CYSLT2R</i> | CYSLT2RS1  | 2797              | A/G       | Exon1-UTR                    | rs912277   | 0.417                             |
| 65  |                | CYSLT2RS2  | 3078              | A/C       | Exon1-UTR                    | rs1323552  | 0.489                             |
| 66  |                | CYSLT2RS3  | 3105              | A/G       | Exon1-UTR                    | New        | 0.116                             |
| 67  | <i>FLAP</i>    | FLAPS1     | 162               | C/A       | Intron1                      | rs4769055  | 0.522                             |
| 68  |                | FLAPS2     | 838               | T/G       | Intron1                      | rs9579645  | 0.096                             |
| 69  |                | FLAPS3     | 7272              | A/G       | Intron1                      | rs9551960  | 0.339                             |
| 70  |                | FLAPS4     | 8640              | A/C       | Intron2                      | rs3803277  | 0.406                             |
| 71  |                | FLAPS5     | 8733              | T/C       | Intron2                      | rs3803278  | 0.370                             |
| 72  |                | FLAPS6     | 13 674            | G/A       | Intron2                      | rs4075692  | 0.286                             |
| 73  |                | FLAPS7     | 20 616            | G/C       | Intron3                      | New        | 0.286                             |
| 74  |                | FLAPS8     | 20 648            | C/T       | Intron3                      | rs4468448  | 0.240                             |
| 75  |                | FLAPS9     | 23 849            | T/A       | Intron3                      | rs9551964  | 0.277                             |
| 76  |                | FLAPS9.5   | 24 348            | G/A       | Intron3                      | New        | 0.006                             |
| 77  |                | FLAPS10    | 28 209            | A/G       | Intron3                      | rs4769060  | 0.401                             |
| 78  | <i>HPGD</i>    | HPGDS1     | 464               | G/A       | Exon2-synonymous             | rs1050145  | 0.220                             |
| 79  |                | HPGDS2     | 798               | A/G       | Intron2                      | rs1365613  | 0.447                             |
| 80  |                | HPGDS3     | 13 332            | A/C       | Intron3                      | rs2555629  | 0.405                             |
| 81  |                | HPGDS4     | 13 430            | A/T       | Intron3                      | New        | 0.253                             |
| 82  |                | HPGDS5     | 20 442            | A/G       | Intron4                      | New        | 0.446                             |
| 83  |                | HPGDS6     | 20 516            | G/A       | Intron4                      | New        | 0.110                             |
| 84  | <i>IGF1</i>    | IGF1S1     | 3083              | A/G       | Intron2                      | rs2162679  | 0.368                             |
| 85  |                | IGF1S2     | 9917              | G/T       | Intron3                      | rs1019731  | 0.021                             |
| 86  |                | IGF1S3     | 17 640            | G/C       | Intron3                      | rs2195239  | 0.426                             |
| 87  |                | IGF1S4     | 17 695            | T/C       | Intron3                      | rs2195240  | 0.443                             |
| 88  |                | IGF1S5     | 49 421            | G/A       | Intron3                      | rs972936   | 0.484                             |
| 89  |                | IGF1S6     | 60 710            | G/A       | Intron3                      | rs2072592  | 0.245                             |
| 90  |                | IGF1S7     | 72 103            | G/A       | Intron5                      | rs978458   | 0.135                             |
| 91  |                | IGF1S8     | 84 150            | G/A       | Exon6-UTR                    | rs6219     | 0.271                             |
| 92  | <i>IL13</i>    | IL13S1     | -978              | C/T       | Promoter                     | rs11575055 | 0.179                             |
| 93  |                | IL13S2     | 571               | C/A       | Intron1                      | rs2066960  | 0.281                             |
| 94  |                | IL13S3     | 598               | G/C       | Intron1                      | rs1295987  | 0.120                             |
| 95  |                | IL13S4     | 805               | C/T       | Intron1                      | rs2069744  | 0.120                             |
| 96  |                | IL13S5     | 2100              | G/A       | Exon4-non-synonymous (R144Q) | rs20541    | 0.333                             |
| 97  | <i>IL4</i>     | IL4S1      | -219              | T/C       | Promoter                     | rs2243250  | 0.328                             |
| 98  |                | IL4S2      | 3353              | A/C       | Intron2                      | rs2227284  | 0.255                             |
| 99  |                | IL4S3      | 3927              | C/G       | Intron2                      | rs2243263  | 0.073                             |
| 100 | <i>LTA4H</i>   | LTA4HS1    | 9153              | A/G       | Intron3                      | rs763842   | 0.226                             |
| 101 |                | LTA4HS4    | 20 165            | T/C       | Intron11                     | rs1978331  | 0.335                             |
| 102 | <i>LTB4DH</i>  | LTB4DHS1   | 4435              | A/T       | Intron2                      | New        | 0.506                             |
| 103 |                | LTB4DHS2   | 8896              | A/G       | Intron4                      | New        | 0.283                             |
| 104 |                | LTB4DHS2.5 | 9182              | A/G       | Intron4                      | New        | 0.092                             |
| 105 |                | LTB4DHS5   | 9502              | C/T       | Intron4                      | rs1053968  | 0.005                             |
| 106 |                | LTB4DHS6   | 13 234            | C/G       | Intron4                      | New        | 0.319                             |
| 107 |                | LTB4DHS6.5 | 13 249            | A/G       | Intron4                      | New        | 0.231                             |
| 108 |                | LTB4DHS7   | 20 718            | G/A       | Intron6                      | New        | 0.253                             |
| 109 |                | LTB4DHS8   | 25 971            | A/G       | Intron8                      | rs1322258  | 0.347                             |
| 110 |                | LTB4DHS9   | 26 221            | A/G       | Intron8                      | New        | 0.406                             |
| 111 |                | LTB4DHS10  | 35 589            | A/C       | Intron9                      | rs2146078  | 0.229                             |
| 112 |                | LTB4DHS11  | 35 819            | G/A       | Intron9                      | New        | 0.354                             |
| 113 | <i>LTB4R</i>   | LTB4RS1    | 1165              | G/C       | Exon1-UTR                    | New        | 0.140                             |
| 114 | <i>LTC4S</i>   | LTC4SS1.5  | -348              | A/C       | Promoter                     | New        | 0.208                             |
| 115 |                | LTC4SS2    | 289               | G/C       | Intron1                      | New        | 0.026                             |
| 116 |                | LTC4SS3    | 1296              | C/T       | Intron1                      | New        | 0.208                             |
| 117 |                | LTC4SS4    | 2659              | A/G       | Intron5                      | New        | 0.201                             |
| 118 | <i>MGST2</i>   | MGST2S1    | 815               | A/G       | Intron1                      | rs1000222  | 0.292                             |
| 119 |                | MGST2S2    | 12 971            | C/T       | Intron2                      | rs795589   | 0.198                             |
| 120 |                | MGST2S3    | 12 977            | A/C       | Intron2                      | rs795588   | 0.077                             |
| 121 | <i>MMP1</i>    | MMP1S1     | 193               | G/A       | Intron1                      | rs470358   | 0.292                             |
| 122 |                | MMP1S2     | 2579              | G/A       | Exon5-synonymous             | rs470558   | 0.130                             |
| 123 |                | MMP1S3     | 7300              | T/C       | Intron8                      | rs470747   | 0.137                             |
| 124 |                | MMP1S4     | 7815              | C/T       | Exon10-UTR                   | rs2239008  | 0.319                             |
| 125 |                | MMP1S5     | 7936              | T/C       | Exon10-UTR                   | rs2071230  | 0.298                             |

Continued

Table 1. Continued

| No. | Gene            | SNP        | Sequence position | Variation | Localization                  | rs ID     | Minor allele frequencies (96 CTR) |
|-----|-----------------|------------|-------------------|-----------|-------------------------------|-----------|-----------------------------------|
| 126 | <i>MMP2</i>     | MMP2S1     | 3606              | A/T       | Intron1                       | rs857403  | 0.214                             |
| 127 |                 | MMP2S2     | 3665              | G/A       | Intron1                       | rs1030868 | 0.229                             |
| 128 |                 | MMP2S3     | 6505              | C/T       | Exon5-synonymous              | rs1053605 | 0.208                             |
| 129 |                 | MMP2S4     | 6730              | T/G       | Intron5                       | New       | 0.064                             |
| 130 |                 | MMP2S5     | 6958              | A/G       | Intron5                       | rs866770  | 0.151                             |
| 131 |                 | MMP2S6     | 10 603            | C/T       | Exon7-synonymous              | rs243849  | 0.151                             |
| 132 |                 | MMP2S7     | 10 896            | T/C       | Intron7                       | rs243847  | 0.443                             |
| 133 |                 | MMP2S8     | 14 011            | G/A       | Exon9-synonymous              | rs2287074 | 0.326                             |
| 134 |                 | MMP2S9     | 14 196            | G/A       | Intron9                       | rs243843  | 0.306                             |
| 135 |                 | MMP2S10    | 14 281            | G/A       | Intron9                       | New       | 0.065                             |
| 136 |                 | MMP2S11    | 14 320            | T/C       | Intron9                       | rs243842  | 0.364                             |
| 137 |                 | MMP2S12    | 17 660            | G/T       | Intron9                       | rs171498  | 0.363                             |
| 138 |                 | MMP2S13    | 17 670            | G/T       | Intron9                       | rs243838  | 0.153                             |
| 139 |                 | MMP2S14    | 17 928            | C/T       | Intron10                      | New       | 0.057                             |
| 140 |                 | MMP2S15    | 20 976            | G/A       | Intron11                      | New       | 0.115                             |
| 141 |                 | MMP2S16    | 21 134            | G/A       | Intron11                      | rs243836  | 0.386                             |
| 142 |                 | MMP2S17    | 26 345            | C/T       | Exon13-UTR                    | New       | 0.021                             |
| 143 |                 | MMP2S18    | 26 512            | A/C       | Exon13-UTR                    | rs7201    | 0.234                             |
| 144 | <i>MMP8</i>     | MMP8S1     | 524               | G/A       | Intron1                       | rs1939012 | 0.359                             |
| 145 |                 | MMP8S2     | 5458              | A/G       | Intron4                       | rs1940051 | 0.266                             |
| 146 |                 | MMP8S3     | 11 357            | T/A       | Intron9                       | New       | 0.287                             |
| 147 | <i>MMP9</i>     | MMP8S4     | 11 473            | T/C       | Exon10-synonymous             | New       | 0.016                             |
| 148 |                 | MMP9S1     | 2679              | G/A       | Exon6-non-synonymous (R279Q)  | rs2664538 | 0.382                             |
| 149 |                 | MMP9S2     | 3029              | A/C       | Intron6                       | rs2236416 | 0.179                             |
| 150 |                 | MMP9S3     | 5565              | G/A       | Exon12-non-synonymous (R668Q) | rs2274756 | 0.214                             |
| 151 |                 | MMP9S4     | 7419              | G/A       | Exon13-synonymous             | rs13925   | 0.292                             |
| 152 | <i>P2Y10</i>    | P2Y10S1    | 1192              | A/G       | Intron1                       | New       | 0.016                             |
| 153 |                 | P2Y10S2    | 5030              | C/T       | Intron1                       | rs2858570 | 0.110                             |
| 154 |                 | P2Y10S3    | 5318              | A/T       | Intron1                       | rs2251477 | 0.184                             |
| 155 |                 | P2Y10S4    | 9417              | T/C       | Intron1                       | rs2742205 | 0.115                             |
| 156 | <i>PAFAH1B1</i> | PAFAH1B1S2 | 12 145            | G/T       | Intron1                       | New       | 0.099                             |
| 157 |                 | PAFAH1B1S3 | 21 146            | C/G       | Intron1                       | New       | 0.080                             |
| 158 |                 | PAFAH1B1S4 | 37 780            | A/G       | Intron1                       | rs1266474 | 0.084                             |
| 159 |                 | PAFAH1B1S5 | 38 033            | C/T       | Intron1                       | New       | 0.047                             |
| 160 |                 | PAFAH1B1S6 | 40 522            | G/A       | Intron1                       | New       | 0.130                             |
| 161 |                 | PAFAH1B1S7 | 60 034            | C/T       | Intron2                       | New       | 0.266                             |
| 162 |                 | PAFAH1B1S8 | 68 545            | G/C       | Intron2                       | New       | 0.078                             |
| 163 |                 | PAFAH1B1S9 | 76 403            | T/G       | Intron5                       | New       | 0.032                             |
| 164 | <i>PAFAH1B2</i> | PAFAH1B2S1 | 3971              | T/C       | Intron1                       | rs2008908 | 0.446                             |
| 165 | <i>PAFAH1B3</i> | PAFAH1B3S1 | 2538              | C/T       | Exon4-synonymous              | New       | 0.016                             |
| 166 | <i>PAFAH2</i>   | PAFAH2S1   | 1279              | G/T       | Intron1                       | rs3008423 | 0.172                             |
| 167 |                 | PAFAH2S2   | 4171              | C/T       | Intron1                       | New       | 0.036                             |
| 168 |                 | PAFAH2S3   | 15456             | G/T       | Intron5                       | rs1469512 | 0.214                             |
| 169 | <i>PAI1m2</i>   | PAI1m2S1   | 4484              | G/A       | Intron1                       | rs840088  | 0.401                             |
| 170 |                 | PAI1m2S2   | 5094              | A/G       | Intron1                       | New       | 0.089                             |
| 171 |                 | PAI1m2S3   | 19 022            | C/A       | Intron1                       | rs2099601 | 0.201                             |
| 172 |                 | PAI1m2S4   | 19 047            | A/C       | Intron1                       | New       | 0.201                             |
| 173 |                 | PAI1m2S5   | 19 120            | T/C       | Intron1                       | rs2083120 | 0.201                             |
| 174 |                 | PAI1m2S6   | 19 348            | A/C       | Intron1                       | New       | 0.393                             |
| 175 |                 | PAI1m2S7   | 62 178            | A/G       | Intron8                       | New       | 0.271                             |
| 176 |                 | PDGFBS1    | 581               | G/A       | Intron1                       | rs758588  | 0.184                             |
| 177 | <i>PDGFB</i>    | PDGFBS3    | 20 237            | C/T       | Intron3                       | rs740750  | 0.310                             |
| 178 |                 | PDGFBS4    | 26 041            | C/T       | Intron10                      | rs1864972 | 0.198                             |
| 179 |                 | PDGFBS5    | 35 170            | G/A       | Intron18                      | rs1432878 | 0.108                             |
| 180 |                 | PDGFRLS1   | 978               | G/C       | Intron1                       | rs2720576 | 0.365                             |
| 181 | <i>PDGFRL</i>   | PDGFRLS2   | 1187              | C/T       | Intron1                       | rs2588164 | 0.245                             |
| 182 |                 | PDGFRLS3   | 1416              | T/C       | Intron1                       | rs2588163 | 0.391                             |
| 183 |                 | PDGFRLS4   | 2963              | G/C       | Intron1                       | rs2517267 | 0.458                             |
| 184 |                 | PDGFRLS5   | 3794              | C/G       | Intron1                       | rs2517268 | 0.394                             |
| 185 |                 | PDGFRLS6   | 3882              | G/A       | Intron1                       | New       | 0.216                             |
| 186 |                 | PDGFRLS7   | 3999              | A/G       | Intron1                       | rs2517269 | 0.220                             |
| 187 |                 | PDGFRLS8   | 8893              | G/A       | Intron1                       | New       | 0.226                             |

Continued

Table 1. Continued

| No. | Gene                       | SNP       | Sequence position | Variation | Localization                  | rs ID     | Minor allele frequencies (96 CTR) |
|-----|----------------------------|-----------|-------------------|-----------|-------------------------------|-----------|-----------------------------------|
| 188 | <i>PGDS</i><br><i>PGIS</i> | PDGFRLS9  | 9922              | G/A       | Intron1                       | New       | 0.232                             |
| 189 |                            | PDGFRLS10 | 14 053            | G/C       | Intron2                       | rs2720583 | 0.167                             |
| 190 |                            | PDGFRLS11 | 14 194            | A/C       | Intron2                       | New       | 0.396                             |
| 191 |                            | PDGFRLS12 | 18 220            | T/C       | Intron2                       | rs2427709 | 0.140                             |
| 192 |                            | PDGFRLS13 | 18 473            | G/A       | Intron2                       | rs2588144 | 0.068                             |
| 193 |                            | PDGFRLS15 | 19 592            | T/G       | Intron2                       | rs2246488 | 0.339                             |
| 194 |                            | PDGFRLS16 | 28 052            | G/A       | Intron2                       | rs2517187 | 0.104                             |
| 195 |                            | PDGFRLS17 | 28 449            | C/T       | Intron2                       | rs2237823 | 0.104                             |
| 196 |                            | PDGFRLS18 | 31 111            | T/C       | Intron2                       | rs2517198 | 0.094                             |
| 197 |                            | PDGFRLS19 | 31 230            | A/T       | Intron2                       | New       | 0.260                             |
| 198 |                            | PDGFRLS20 | 31 258            | A/G       | Intron2                       | New       | 0.031                             |
| 199 |                            | PDGFRLS21 | 31 499            | T/C       | Intron2                       | rs2427715 | 0.094                             |
| 200 |                            | PDGFRLS22 | 31 600            | T/C       | Intron2                       | New       | 0.167                             |
| 201 |                            | PDGFRLS23 | 33 975            | G/C       | Intron2                       | rs2517208 | 0.037                             |
| 202 |                            | PDGFRLS24 | 41 991            | A/G       | Intron2                       | rs2237831 | 0.189                             |
| 203 |                            | PDGFRLS25 | 42 131            | G/A       | Intron2                       | rs2237831 | 0.205                             |
| 204 |                            | PDGFRLS26 | 43 810            | G/T       | Intron2                       | New       | 0.073                             |
| 205 |                            | PDGFRLS27 | 46 759            | T/C       | Intron3                       | New       | 0.120                             |
| 206 |                            | PDGFRLS28 | 46 888            | G/A       | Intron3                       | rs2237835 | 0.226                             |
| 207 |                            | PDGFRLS29 | 46 936            | C/G       | Intron3                       | New       | 0.074                             |
| 208 |                            | PDGFRLS30 | 47 097            | C/G       | Intron3                       | New       | 0.197                             |
| 209 |                            | PDGFRLS31 | 49 411            | A/C       | Intron3                       | rs2237836 | 0.548                             |
| 210 |                            | PDGFRLS32 | 49 937            | G/T       | Intron3                       | rs2237837 | 0.103                             |
| 211 |                            | PDGFRLS33 | 53 887            | T/C       | Intron4                       | rs2237842 | 0.188                             |
| 212 |                            | PDGFRLS34 | 56 021            | C/T       | Intron4                       | rs2427719 | 0.063                             |
| 213 |                            | PDGFRLS35 | 56 410            | T/C       | Intron4                       | rs2237845 | 0.240                             |
| 214 |                            | PDGFRLS36 | 65 408            | C/T       | Intron5                       | New       | 0.083                             |
| 215 |                            | PDGFRLS37 | 65 512            | T/C       | Exon6-synonymous              | rs4705    | 0.521                             |
| 216 |                            | PGDSS1    | 5446              | T/C       | Intron1                       | rs2129595 | 0.191                             |
| 217 |                            | PGISS1    | 4650              | T/C       | Intron1                       | rs477627  | 0.063                             |
| 218 |                            | PGISS2    | 6734              | A/C       | Intron1                       | rs927068  | 0.226                             |
| 219 |                            | PGISS3    | 6840              | T/C       | Intron1                       | New       | 0.226                             |
| 220 |                            | PGISS4    | 6870              | G/C       | Intron1                       | rs498646  | 0.276                             |
| 221 |                            | PGISS4.5  | 6924              | T/C       | Intron1                       | rs476496  | 0.280                             |
| 222 |                            | PGISS6    | 28 941            | A/G       | Intron5                       | rs501908  | 0.033                             |
| 223 |                            | PGISS7    | 41 990            | A/G       | Intron5                       | New       | 0.093                             |
| 224 |                            | PGISS8    | 44 026            | G/A       | Exon6-synonymous              | rs5628    | 0.036                             |
| 225 |                            | PGISS9    | 50 926            | C/T       | Intron6                       | New       | 0.104                             |
| 226 |                            | PGISS10   | 55 002            | C/A       | Intron8                       | rs5629    | 0.281                             |
| 227 |                            | PGISS11   | 57 532            | A/G       | Intron9                       | rs729824  | 0.226                             |
| 228 |                            | PGISS12   | 62 730            | T/C       | Exon10-UTR                    | rs5602    | 0.438                             |
| 229 | <i>PLA2G7</i>              | PLA2G7S1  | 2007              | G/T       | Intron1                       | New       | 0.214                             |
| 230 |                            | PLA2G7S2  | 2338              | G/A       | Intron1                       | rs1421369 | 0.468                             |
| 231 |                            | PLA2G7S3  | 6203              | G/A       | Intron1                       | New       | 0.141                             |
| 232 |                            | PLA2G7S4  | 20 965            | G/T       | Intron5                       | rs1362931 | 0.042                             |
| 233 |                            | PLA2G7S5  | 23 741            | T/C       | Exon7-non-synonymous (I198T)  | rs1805018 | 0.281                             |
| 234 |                            | PLA2G7S6  | 27 025            | C/G       | Intron9                       | rs2216465 | 0.542                             |
| 235 |                            | PLA2G7S7  | 30 101            | C/T       | Exon11-non-synonymous (A379V) | rs1051931 | 0.042                             |
| 236 | <i>PTAFR</i>               | PTAFRS3   | 36 031            | C/A       | Exon2-non-synonymous (A224D)  | rs5938    | 0.068                             |
| 237 | <i>PTGDR</i>               | PTGDRS1   | 408               | G/A       | Intron1                       | New       | 0.021                             |
| 238 |                            | PTGDRS2   | 3290              | A/G       | Intron1                       | rs1254609 | 0.194                             |
| 239 |                            | PTGDRS3   | 5754              | T/C       | Intron1                       | New       | 0.075                             |
| 240 | <i>PTGDS</i>               | PTGDRS4   | 5793              | A/G       | Intron1                       | rs708486  | 0.081                             |
| 241 |                            | PTGDSS1   | 4186              | C/A       | Exon7-UTR                     | rs6926    | 0.198                             |
| 242 | <i>EP1</i>                 | PTGER1S1  | -267              | G/C       | Promoter                      | New       | 0.109                             |
| 243 | <i>EP2</i>                 | PTGER2uS1 | -26 643           | T/C       | 5'-Upstream                   | rs988209  | 0.232                             |
| 244 |                            | PTGER2uS2 | -18 461           | T/G       | 5'-Upstream                   | rs1390375 | 0.077                             |
| 245 |                            | PTGER2uS3 | -18 360           | G/A       | 5'-Upstream                   | rs1390374 | 0.022                             |
| 246 |                            | PTGER2uS4 | -15 332           | A/T       | 5'-Upstream                   | rs708490  | 0.444                             |
| 247 |                            | PTGER2uS5 | -12 813           | G/A       | 5'-Upstream                   | New       | 0.223                             |
| 248 |                            | PTGER2uS6 | -10 918           | A/G       | 5'-Upstream                   | New       | 0.449                             |

Continued

Table 1. Continued

| No. | Gene         | SNP        | Sequence position | Variation | Localization  | rs ID     | Minor allele frequencies (96 CTR) |
|-----|--------------|------------|-------------------|-----------|---------------|-----------|-----------------------------------|
| 249 | <i>EP3</i>   | PTGER2uS7  | -10 814           | T/A       | 5'-upstream   | New       | 0.427                             |
| 250 |              | PTGER2uS8  | -10 250           | A/G       | 5'-upstream   | rs714366  | 0.433                             |
| 251 |              | PTGER2uS9  | -7075             | A/G       | 5'-upstream   | New       | 0.452                             |
| 252 |              | PTGER2uS10 | -6179             | A/G       | 5'-upstream   | New       | 0.479                             |
| 253 |              | PTGER2S1   | -609              | G/A       | Promoter      | rs1254601 | 0.288                             |
| 254 |              | PTGER2S2   | 300               | G/A       | Exon1-UTR     | rs1254600 | 0.462                             |
| 255 |              | PTGER2S3   | 498               | C/G       | Exon1-UTR     | rs2075797 | 0.441                             |
| 256 |              | PTGER2S4   | 948               | A/G       | Exon1-UTR     | rs1353411 | 0.417                             |
| 257 |              | PTGER2S5   | 1042              | G/A       | Exon1-UTR     | rs1254598 | 0.350                             |
| 258 |              | PTGER2S6   | 2803              | G/A       | Intron1       | New       | 0.164                             |
| 259 |              | PTGER2S7   | 2988              | C/T       | Intron1       | New       | 0.339                             |
| 260 |              | PTGER2S8   | 6063              | C/T       | Intron1       | New       | 0.116                             |
| 261 |              | PTGER2S9   | 10 927            | T/G       | Intron1       | rs1254585 | 0.446                             |
| 262 |              | PTGER2S10  | 14 081            | C/T       | Exon2-UTR     | rs708502  | 0.398                             |
| 263 |              | PTGER2dS1  | 29 784            | C/T       | 3'-Downstream | rs708511  | 0.219                             |
| 264 |              | PTGER2dS2  | 47 461            | A/G       | 3'-Downstream | New       | 0.226                             |
| 265 |              | PTGER2dS3  | 57 931            | C/T       | 3'-Downstream | rs708531  | 0.750                             |
| 266 |              | PTGER2dS4  | 58 051            | C/T       | 3'-Downstream | rs708532  | 0.329                             |
| 267 |              | PTGER3S1   | 27 837            | G/A       | Intron1       | rs1008484 | 0.058                             |
| 268 |              | PTGER3S2   | 28 078            | G/A       | Intron1       | rs1569593 | 0.258                             |
| 269 |              | PTGER3S5   | 36 177            | A/T       | Intron2       | rs5680    | 0.313                             |
| 270 |              | PTGER3S7   | 44 999            | T/G       | Intron2       | rs1983588 | 0.268                             |
| 271 |              | PTGER3S8   | 45 040            | A/C       | Intron2       | rs1983587 | 0.059                             |
| 272 |              | PTGER3S9   | 54 444            | G/C       | Intron2       | rs1883461 | 0.054                             |
| 273 |              | PTGER3S10  | 54 634            | T/A       | Intron2       | rs1883460 | 0.094                             |
| 274 |              | PTGER3S11  | 58 525            | C/T       | Intron2       | New       | 0.271                             |
| 275 |              | PTGER3S12  | 65 699            | G/C       | Intron2       | rs647921  | 0.048                             |
| 276 |              | PTGER3S13  | 65 973            | A/T       | Intron2       | rs646621  | 0.443                             |
| 277 |              | PTGER3S14  | 70 342            | G/A       | Intron2       | rs909842  | 0.442                             |
| 278 |              | PTGER3S15  | 70 357            | A/C       | Intron2       | New       | 0.300                             |
| 279 |              | PTGER3S17  | 70 409            | G/A       | Intron2       | New       | 0.442                             |
| 280 |              | PTGER3S20  | 70 755            | A/T       | Intron2       | rs484675  | 0.441                             |
| 281 |              | PTGER3S24  | 86 923            | A/G       | Intron2       | rs573688  | 0.082                             |
| 282 |              | PTGER3S25  | 95 146            | A/C       | Intron3       | New       | 0.037                             |
| 283 |              | PTGER3S27  | 100 052           | T/C       | Intron3       | rs1409984 | 0.255                             |
| 284 |              | PTGER3S29  | 114 078           | G/A       | Intron3       | rs625617  | 0.371                             |
| 285 |              | PTGER3S30  | 121 798           | C/A       | Intron3       | New       | 0.328                             |
| 286 |              | PTGER3S31  | 121 846           | G/A       | Intron3       | rs602383  | 0.297                             |
| 287 |              | PTGER3S32  | 149 402           | C/T       | Intron3       | rs1409165 | 0.370                             |
| 288 |              | PTGER3S33  | 149 626           | G/A       | Intron3       | rs1409166 | 0.398                             |
| 289 |              | PTGER3S35  | 160 372           | A/G       | Intron3       | New       | 0.214                             |
| 290 |              | PTGER3S36  | 160 403           | A/G       | Intron3       | rs1409978 | 0.319                             |
| 291 |              | PTGER3S37  | 160 432           | C/G       | Intron3       | New       | 0.214                             |
| 292 | <i>EP4</i>   | PTGER4S1   | 5748              | C/T       | Intron2       | New       | 0.389                             |
| 293 |              | PTGER4S2   | 7984              | A/G       | Intron2       | New       | 0.198                             |
| 294 |              | PTGER4S3   | 8012              | G/A       | Intron2       | New       | 0.385                             |
| 295 | <i>PTGES</i> | PTGESS1    | 214               | A/G       | Intron1       | rs2241271 | 0.135                             |
| 296 |              | PTGESS2    | 406               | G/A       | Intron1       | rs2241270 | 0.120                             |
| 297 |              | PTGESS3    | 9636              | T/C       | Intron2       | New       | 0.326                             |
| 298 | <i>PTGFR</i> | PTGESS4    | 9669              | G/A       | Intron2       | New       | 0.152                             |
| 299 |              | PTGFRS1    | 714               | A/C       | Intron1       | rs3766355 | 0.425                             |
| 300 |              | PTGFRS2    | 823               | G/A       | Intron1       | rs3766354 | 0.204                             |
| 301 |              | PTGFRS3    | 1132              | G/T       | Intron1       | rs3766353 | 0.242                             |
| 302 |              | PTGFRS4    | 3617              | G/A       | Intron2       | rs1830763 | 0.489                             |
| 303 |              | PTGFRS5    | 6578              | A/C       | Intron2       | rs1322935 | 0.031                             |
| 304 |              | PTGFRS6    | 8734              | A/G       | Intron2       | rs2057423 | 0.452                             |
| 305 |              | PTGFRS10   | 24 552            | G/A       | Intron2       | rs3766346 | 0.036                             |
| 306 |              | PTGFRS12   | 33 123            | A/C       | Intron2       | rs520171  | 0.276                             |
| 307 |              | PTGFRS13   | 33 548            | G/C       | Intron2       | rs3766345 | 0.516                             |
| 308 |              | PTGFRS14   | 38 195            | T/C       | Intron2       | rs3766338 | 0.266                             |
| 309 |              | PTGFRS15   | 38 202            | C/T       | Intron2       | rs590309  | 0.511                             |
| 310 |              | PTGFRS16   | 40 734            | G/C       | Intron2       | rs622346  | 0.202                             |
| 311 |              | PTGFRS19   | 46 572            | A/G       | Exon3-UTR     | rs3766331 | 0.115                             |
| 312 |              | PTGFRS20   | 46 628            | A/G       | Exon3-UTR     | rs899     | 0.005                             |

Continued

Table 1. Continued

| No. | Gene           | SNP          | Sequence position | Variation | Localization                 | rs ID      | Minor allele frequencies (96 CTR) |
|-----|----------------|--------------|-------------------|-----------|------------------------------|------------|-----------------------------------|
| 313 | <i>PTGS1</i>   | PTGS1S1      | 2850              | C/T       | Intron2                      | rs1213264  | 0.063                             |
| 314 |                | PTGS1S2      | 3219              | T/C       | Intron2                      | rs1213265  | 0.067                             |
| 315 |                | PTGS1S2.5    | 7468              | C/G       | Intron3                      | rs2282169  | 0.079                             |
| 316 |                | PTGS1S4      | 23 970            | C/A       | Exon11-UTR                   | rs10306194 | 0.028                             |
| 317 | <i>SCYA5</i>   | SCYA5S1      | 328               | T/C       | Intron1                      | rs2280789  | 0.349                             |
| 318 | <i>SCYB14</i>  | SCYB14S1     | 313               | T/C       | Intron1                      | rs2072347  | 0.311                             |
| 319 |                | SCYB14S2     | 2099              | G/C       | Intron2                      | rs2237062  | 0.307                             |
| 320 |                | SCYB14S3     | 6261              | C/T       | Intron3                      | rs1016666  | 0.370                             |
| 321 | <i>SLC21A9</i> | SLC21A9S1    | 196               | T/C       | Exon1-UTR                    | New        | 0.158                             |
| 322 |                | SLC21A9S2    | 231               | G/A       | Exon1-UTR                    | rs1944612  | 0.055                             |
| 323 |                | SLC21A9S3    | 4589              | C/T       | Intron1                      | New        | 0.443                             |
| 324 |                | SLC21A9S5    | 10 724            | A/G       | Intron1                      | New        | 0.374                             |
| 325 |                | SLC21A9S6    | 13 387            | G/C       | Intron3                      | New        | 0.453                             |
| 326 |                | SLC21A9S7    | 15 413            | G/A       | Intron4                      | rs949069   | 0.391                             |
| 327 |                | SLC21A9S8    | 15 916            | A/G       | Intron4                      | New        | 0.161                             |
| 328 |                | SLC21A9S9    | 17 493            | G/A       | Intron4                      | rs1676878  | 0.136                             |
| 329 |                | SLC21A9S10   | 24 698            | A/G       | Intron7                      | rs1676881  | 0.226                             |
| 330 |                | SLC21A9S10.5 | 24 880            | C/T       | Intron7                      | rs1612859  | 0.458                             |
| 331 |                | SLC21A9S11   | 25 005            | T/A       | Intron7                      | rs1789693  | 0.401                             |
| 332 |                | SLC21A9S13   | 26 261            | T/G       | Intron7                      | New        | 0.376                             |
| 333 |                | SLC21A9S14   | 39 441            | G/A       | Intron8                      | rs1789692  | 0.479                             |
| 334 |                | SLC21A9S15   | 43 575            | C/T       | Intron9                      | New        | 0.430                             |
| 335 |                | SLC21A9S16   | 45 422            | C/T       | Exon10                       | New        | 0.432                             |
| 336 | <i>STAT2</i>   | STAT2S1      | 10 525            | A/G       | Intron14                     | rs2020854  | 0.021                             |
| 337 | <i>STAT4</i>   | STAT4S1      | 5564              | C/A       | Intron3                      | rs1031509  | 0.396                             |
| 338 |                | STAT4S2      | 19 235            | G/A       | Intron3                      | rs1551443  | 0.214                             |
| 339 |                | STAT4S3      | 91 147            | A/T       | Intron10                     | New        | 0.516                             |
| 340 |                | STAT4S4      | 100 038           | G/C       | Intron14                     | rs1400655  | 0.095                             |
| 341 |                | STAT4S5      | 118 213           | A/G       | Intron21                     | rs925847   | 0.553                             |
| 342 |                | STAT4S6      | 119 708           | A/C       | Intron22                     | rs1517351  | 0.495                             |
| 343 |                | STAT4S7      | 119 711           | G/A       | Intron22                     | New        | 0.165                             |
| 344 | <i>TBX21</i>   | TBX21S1      | 8941              | T/C       | Intron1                      | rs2158079  | 0.201                             |
| 345 | <i>TBXA2R</i>  | TBXA2RS1     | 10937             | T/C       | Exon3-synonymous             | rs4523     | 0.184                             |
| 346 | <i>TXAs</i>    | TXAsS2       | 17778             | A/C       | Intron1                      | rs41708    | 0.302                             |
| 347 |                | TXAsS3       | 24573             | T/C       | Intron1                      | rs41706    | 0.355                             |
| 348 |                | TXAsS4       | 29218             | A/T       | Intron1                      | rs194150   | 0.443                             |
| 349 |                | TXAsS5       | 57546             | T/G       | Intron3                      | rs1015571  | 0.447                             |
| 350 |                | TXAsS7       | 63115             | C/A       | Intron3                      | rs2013219  | 0.426                             |
| 351 |                | TXAsS9       | 69322             | G/A       | Intron3                      | rs757762   | 0.447                             |
| 352 |                | TXAsS11      | 80249             | C/T       | Intron3                      | rs1978180  | 0.028                             |
| 353 |                | TXAsS13      | 1 06 385          | T/C       | Intron4                      | rs41733    | 0.117                             |
| 354 |                | TXAsS14      | 1 06 401          | G/A       | Intron4                      | rs41732    | 0.117                             |
| 355 |                | TXAsS15      | 1 12 521          | T/C       | Intron5                      | New        | 0.247                             |
| 356 |                | TXAsS16      | 1 12 694          | C/T       | Intron5                      | rs42335    | 0.134                             |
| 357 |                | TXAsS17      | 1 15 453          | G/A       | Intron5                      | New        | 0.011                             |
| 358 |                | TXAsS21      | 1 28 260          | G/T       | Intron7                      | New        | 0.165                             |
| 359 |                | TXAsS22      | 1 39 370          | T/C       | Intron9                      | rs41718    | 0.146                             |
| 360 |                | TXAsS23      | 1 46 442          | T/C       | Intron9                      | rs740150   | 0.389                             |
| 361 |                | TXAsS24      | 1 52 303          | A/G       | Intron9                      | rs193949   | 0.177                             |
| 362 |                | TXAsS25      | 1 52 455          | C/T       | Intron9                      | New        | 0.308                             |
| 363 |                | TXAsS29      | 1 78 072          | G/A       | Intron10                     | rs740204   | 0.234                             |
| 364 |                | TXAsS30      | 1 86 274          | G/A       | Intron10                     | New        | 0.479                             |
| 365 | <i>UPAR</i>    | UPARS1       | 11 475            | A/C       | Intron3                      | New        | 0.019                             |
| 366 |                | UPARS2       | 11 639            | G/A       | Intron3                      | rs2283628  | 0.335                             |
| 367 |                | UPARS3       | 11 667            | A/C       | Intron3                      | rs2239373  | 0.385                             |
| 368 |                | UPARS4       | 11 746            | C/T       | Intron3                      | rs2239372  | 0.375                             |
| 369 |                | UPARS5       | 18 100            | C/T       | Intron5                      | rs2302525  | 0.074                             |
| 370 |                | UPARS6       | 18 228            | A/G       | Exon6-non-synonymous (K220R) | rs2302524  | 0.114                             |

The SNPs applied to the first screening are listed. The sequence position indicates the location of the SNP relative to the transcription initiation site of exon1 of each gene. The variation of allele and the localization in gene structure are shown. Each given SNP is referenced an accession number in dbSNP created by NCBI, rs ID (<http://www.ncbi.nlm.nih.gov/SNP/>). The New findings are mentioned as 'new'. The minor allele frequency of each SNP typed in the control sample of 96 individuals is shown.



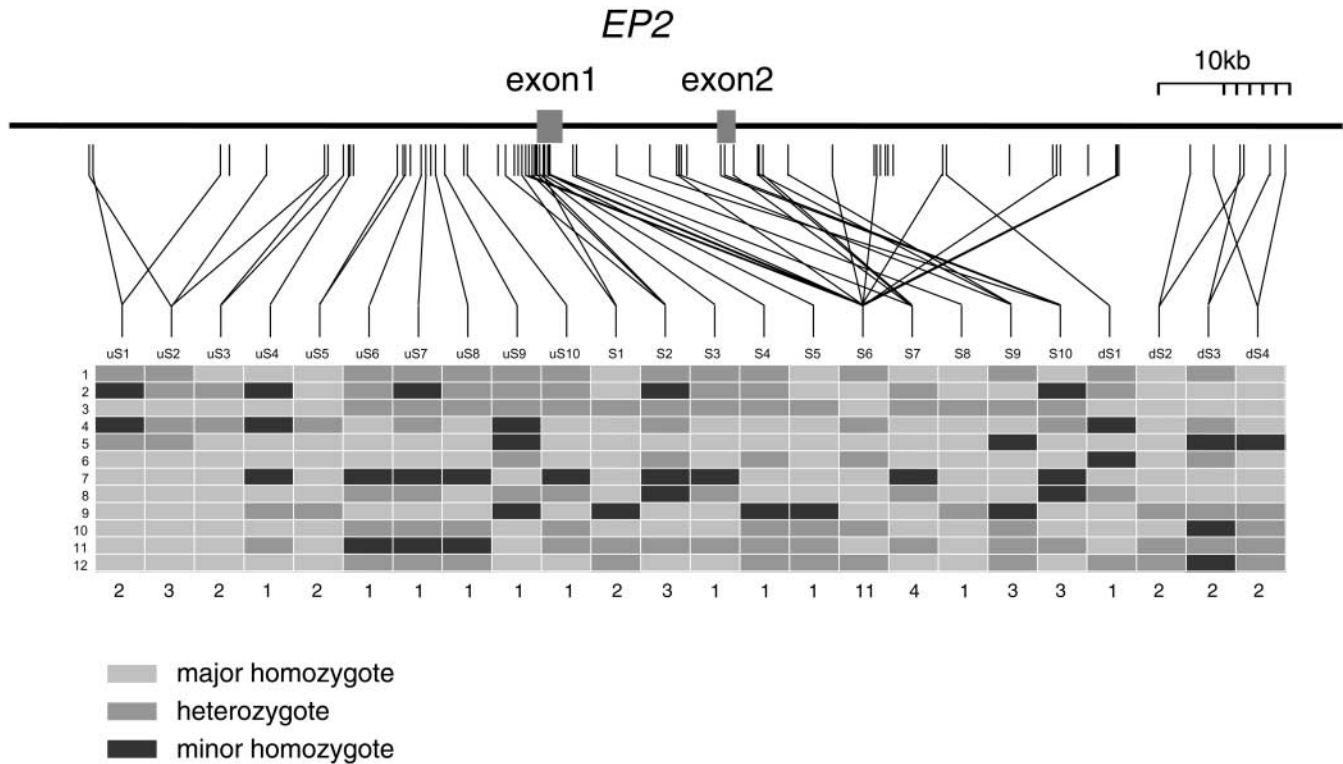

**Figure 1.** SNP location in *EP2* gene and subgrouping for screening. Locations of 77 SNPs in the genomic region from 35 kb upstream of exon 1 to 43 kb downstream of exon 2 are depicted. The 77 SNPs were categorized into 12 groups on the basis of the rule of perfect matching of genotypes with 12 individuals (SNP-group is connected by line). SNPs <5% of minor allele frequency were not subgrouped. In the block table, light gray box shows homozygote for major allele, mid-gray box heterozygote and dark gray box homozygote for minor allele. The numbers of SNPs belonging to each group are shown under the block tables.

**Table 2.** Allele frequencies of SNPs of *EP2* and comparisons between AIA and ATA and AIA and CTR

|      | Position | Variation | Localization  | Allele count |     |     | Minor allele frequency |       |       | Permutation <i>P</i> value |                |
|------|----------|-----------|---------------|--------------|-----|-----|------------------------|-------|-------|----------------------------|----------------|
|      |          |           |               | AIA          | CTR | ATA | AIA                    | CTR   | ATA   | AIA versus CTR             | AIA versus ATA |
| uS5  | -12 813  | G/A       | 5'-Upstream   | 396          | 548 | 564 | 0.311                  | 0.221 | 0.222 | 0.0016**                   | 0.0017**       |
| uS6  | -10 918  | A/G       | 5'-Upstream   | 392          | 528 | 526 | 0.395                  | 0.449 | 0.451 | 0.0844                     | 0.0912         |
| uS7  | -10 814  | T/A       | 5'-Upstream   | 396          | 540 | 562 | 0.492                  | 0.428 | 0.397 | 0.0393*                    | 0.0025**       |
| uS8  | -10 250  | A/G       | 5'-Upstream   | 384          | 522 | 516 | 0.393                  | 0.433 | 0.438 | 0.1767                     | 0.1716         |
| uS9  | -7075    | A/G       | 5'-Upstream   | 384          | 504 | 522 | 0.432                  | 0.452 | 0.469 | 0.5329                     | 0.2594         |
| uS10 | -6179    | A/G       | 5'-Upstream   | 374          | 526 | 564 | 0.374                  | 0.401 | 0.452 | 0.4213                     | 0.0199*        |
| S1   | -609     | G/A       | Promoter      | 396          | 538 | 564 | 0.348                  | 0.288 | 0.303 | 0.0554                     | 0.1175         |
| S2   | 300      | G/A       | Exon1(UTR)    | 384          | 530 | 558 | 0.445                  | 0.462 | 0.504 | 0.6037                     | 0.0757         |
| S3   | 498      | C/G       | Exon1(UTR)    | 392          | 534 | 558 | 0.401                  | 0.427 | 0.468 | 0.4121                     | 0.0393*        |
| S4   | 948      | A/G       | Exon1(UTR)    | 396          | 532 | 564 | 0.477                  | 0.417 | 0.415 | 0.0665                     | 0.0480*        |
| S5   | 1042     | G/A       | Exon1(UTR)    | 396          | 514 | 564 | 0.422                  | 0.350 | 0.367 | 0.0276*                    | 0.0844         |
| S6   | 2803     | G/A       | Intron1       | 390          | 538 | 554 | 0.141                  | 0.164 | 0.132 | 0.3396                     | 0.6785         |
| S7   | 2988     | C/T       | Intron1       | 388          | 528 | 554 | 0.327                  | 0.339 | 0.377 | 0.7125                     | 0.1169         |
| S8   | 6063     | C/T       | Intron1       | 396          | 536 | 562 | 0.109                  | 0.119 | 0.117 | 0.5876                     | 0.6338         |
| S9   | 10 927   | T/G       | Intron1       | 390          | 534 | 548 | 0.474                  | 0.446 | 0.451 | 0.3808                     | 0.4641         |
| S10  | 14 081   | C/T       | Exon2(UTR)    | 378          | 516 | 554 | 0.373                  | 0.399 | 0.419 | 0.4484                     | 0.1632         |
| dS1  | 29 784   | C/T       | 3'-Downstream | 372          | 522 | 542 | 0.194                  | 0.218 | 0.173 | 0.3565                     | 0.4316         |

\*Significant difference at the 5% level, \*\*At the 1% level.

similarities of a gene between species that is used to evaluate evolutionary processes (14). In the LD tree,  $(1 - r^2)$  value was used to calculate a distance matrix for construction of the tree structure. Seventeen SNPs categorized into six subgroups ( $r^2 - a$  to  $-f$ ) were in LD estimated by  $r^2$ -statistic

( $r^2 > 0.5$ ), as shown in Figure 2B. SNPs uS5, uS7, S1, S3, S6 and S8 represented six subgroups, and were combined to construct haplotypes; the haplotype-based associations were tested with 10 000 iterated permutations. Six major haplotypes (each frequency >5%) were observed in 274 CTR (Table 3).

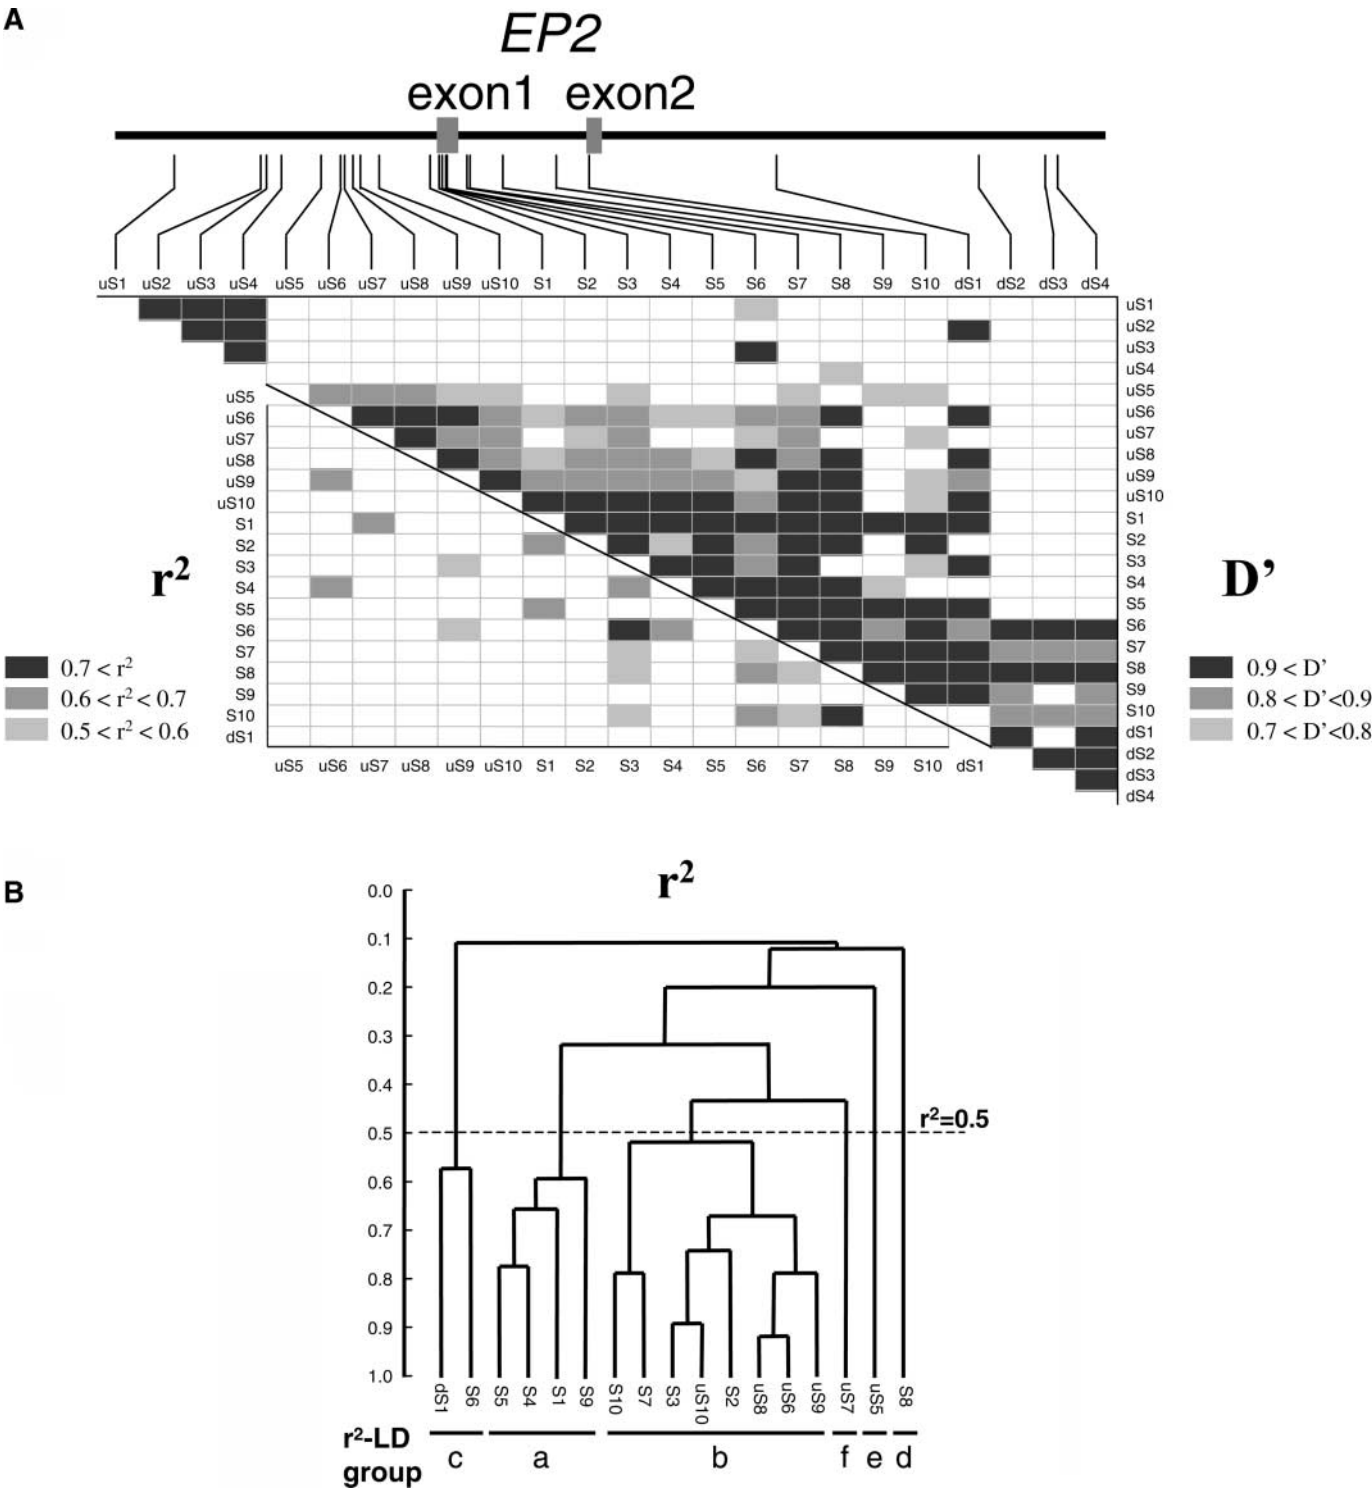

**Figure 2.** LD pattern of *EP2* gene. Pair-wise LD coefficients,  $D'$  and  $r^2$ , were determined and expressed as block structure (A) and UPGMA-based tree structure (B). (A) In the schematic block, shaded boxes of dark gray show pair-wise LD of  $D' > 0.9$ , medium gray  $0.8 < D' < 0.9$  and light gray  $0.7 < D' < 0.8$ . Blank boxes represent  $D' < 0.7$ . For all the pairs of SNPs in the major  $D'$ -LD block (uS5–dS1), pair-wise LD coefficients  $r^2$  are also presented. (B) The major LD block (uS5–dS1) was further analyzed with LD tree constructed according to UPGMA method as described in Materials and Methods. For subgrouping of SNPs based on LD structure,  $r^2 = 0.5$  was utilized for cut-off.

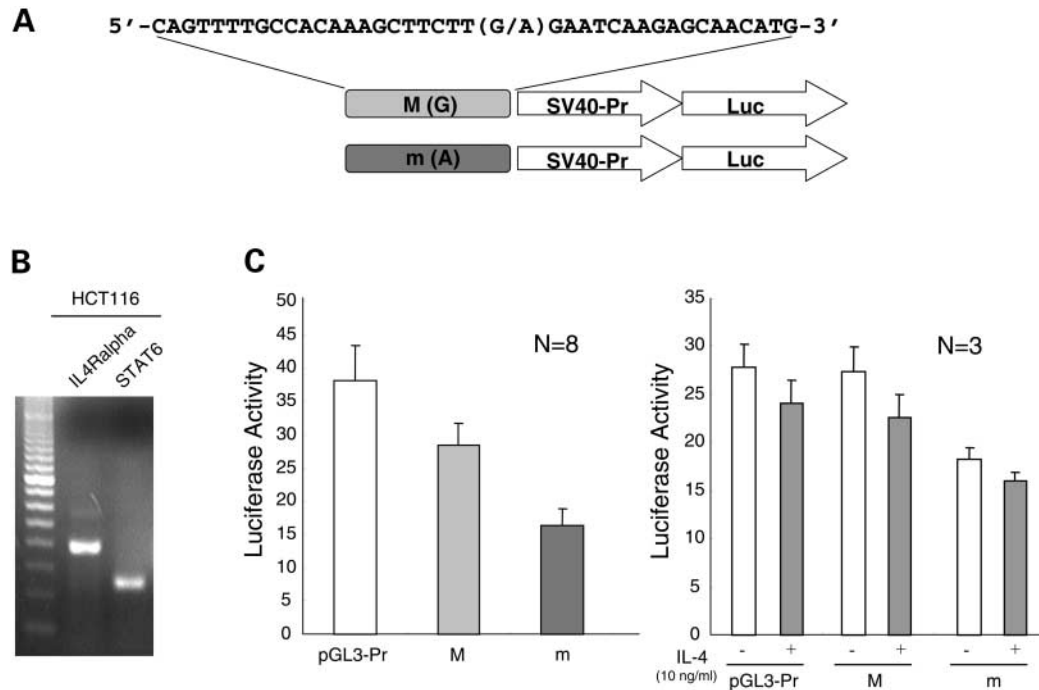

**Figure 3.** uS5 Allele-dependent transcription activity in HCT116 cells. (A) The 41 bp sequences centering on uS5 SNP were subcloned into the reporter vector as described in Materials and Methods. (B) HCT116 cells that endogenously expressed *IL4R $\alpha$*  and *STAT6* genes were used for the experiments. (C) Each reporter vector was transfected into HCT116 cells, and the firefly luciferase activity was normalized with the *Renilla* luciferase activity of co-transfected pRL-TK (left). IL-4 stimulation (10 ng/ml) on the effect of transcription was monitored (right).

**Table 3.** Haplotype-based association study with AIA

| Haplotype: uS5/uS7/S1/S3/S6/S8 | Haplotype frequency |       |       |       | Permutation <i>P</i> value |                |
|--------------------------------|---------------------|-------|-------|-------|----------------------------|----------------|
|                                | Total               | AIA   | CTR   | ATA   | AIA versus CTR             | AIA versus ATA |
| M/M/M/M/M                      | 0.381               | 0.341 | 0.375 | 0.415 | 0.3074                     | 0.0295*        |
| m/m/m/m/m                      | 0.160               | 0.212 | 0.130 | 0.155 | 0.0012**                   | 0.0259*        |
| M/m/M/M/M                      | 0.104               | 0.101 | 0.120 | 0.092 | 0.3515                     | 0.6218         |
| M/m/M/M/M                      | 0.064               | 0.062 | 0.072 | 0.057 | 0.5298                     | 0.7388         |
| M/M/M/M/M                      | 0.059               | 0.056 | 0.060 | 0.058 | 0.8965                     | 0.9032         |
| M/M/m/M/m                      | 0.055               | 0.034 | 0.061 | 0.066 | 0.0636                     | 0.0488*        |

M and m denotes major and minor alleles, respectively.

\*Significant difference at the 5% level, \*\*At the 1% level.

One haplotype, m/m/m/M/M/M at uS5/uS7/S1/S3/S6/S8, showed highly significant difference between AIA and CTR ( $\chi^2 = 11.03$ ,  $df = 1$ ,  $P = 0.0009$ , permutation  $P = 0.0012$ ) (Table 3). The most common haplotype, M/M/M/m/M/M, and the m/m/m/M/M/M haplotype showed significant differences in frequency between AIA and ATA, further supporting the involvement of *EP2* in susceptibility to AIA. The m/m/m/M/M/M haplotype was an at-risk haplotype for AIA, and uS5 a tag-SNP for the haplotype. Similar association evidence with uS5 was observed, indicating that uS5 is likely a causal SNP for AIA.

#### Transcriptional regulatory motif on uS5 site

The 5'-upstream region of the *EP2* gene was surveyed with a TFSEARCH program (15). The sequence surrounding uS5

was predicted to a STATs-binding motif with a possibility to bind subtypes 1, 2, 3, 4 and 6 of the human STAT proteins that play key roles in cytokine signaling (16). Variation of uS5 could affect STAT protein binding affinity, resulting in altered *EP2* transcription activity.

To examine the impact on transcriptional regulation due to the allelic difference of uS5, we cloned the two types of allelic sequence surrounding the uS5 site (41 bp) into upstream of an SV40 promoter-luciferase gene transcriptional unit (Fig. 3A). The effects on transcriptional activity of the 41 bp sequences centering either G allele or A allele of uS5 were investigated in HCT116 cells in which endogenous *IL4R alpha* and *STAT6* gene expressions were confirmed with RT-PCR method (Fig. 3B). Both inserted sequences showed suppressive effects on reporter gene transcription: G allele had 74.6% and A allele had 42.7%

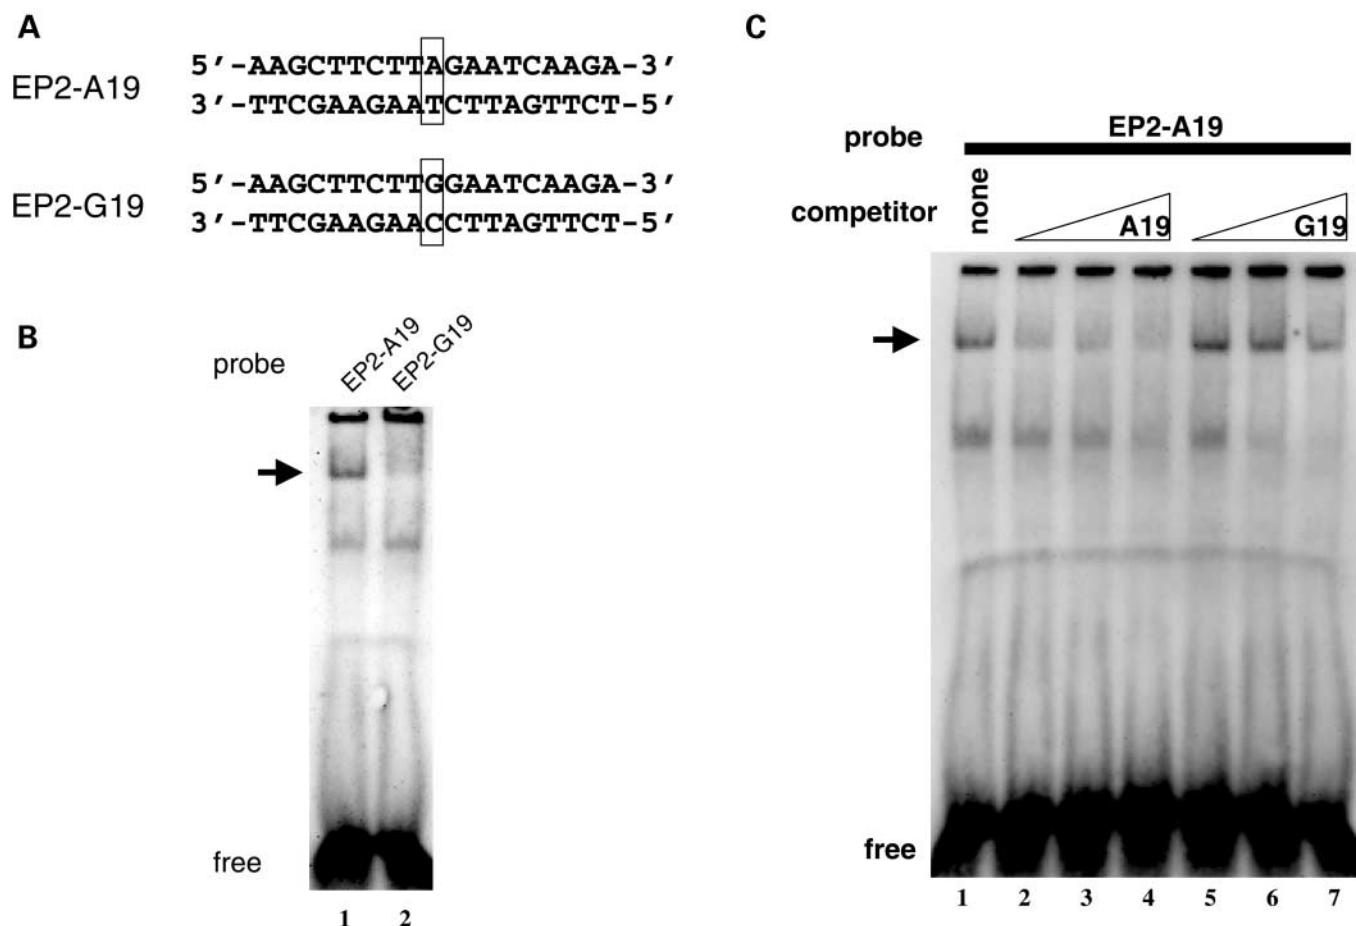

**Figure 4.** EMSA with oligonucleotide containing A allele or G allele of uS5. (A) Double-stranded oligonucleotide probes (*EP2-A19* and *EP2-G19*) labeled with digoxigenin for EMSA are shown. (B) Nuclear extract from HeLa cells was incubated with *EP2-A19* or *EP2-G19* probes. Arrowhead points to specific binding. (C) Specific interaction with *EP2-A19* competed with various amounts of non-labeled *EP2-A19* or *EP2-G19* competitor (6.25-, 12.5- and 25-fold from left to right).

activity of control (Fig. 3C, left). If STAT binding was responsible for repressive transcriptional activity, it should be altered by addition of IL-4. However, the reduced luciferase activities due to the inserted sequences were not affected by the addition of IL-4 (Fig. 3C, right). A allele, the susceptibility allele, showed 2.26-fold greater suppressive effect than G allele, suggesting that the uS5 variant affects the rate of transcription due to differences in nuclear factor interaction.

Accordingly, two digoxigenin-labeled double-stranded oligonucleotides (Fig. 4A) containing A allele (*EP2-A19*) and G allele (*EP2-G19*) were designed for electrophoretic mobility shift assay (EMSA) using HeLa nuclear extract. DNA-protein binding was observed with higher intensity in *EP2-A19* than in *EP2-G19* after incubation with the HeLa nuclear extracts (Fig. 4B), and the DNA-protein interaction was more efficiently competed by unlabeled *EP2-A19* than by unlabeled *EP2-G19* (Fig. 4C). The binding was not observed with purified STAT1 protein (data not shown), and *EP2-A19* had a mismatch for STAT consensus motif, suggesting that a nuclear factor other than STAT proteins is involved in the interaction.

## DISCUSSION

SNPs are being identified and assembled in large SNP databases at a rapid pace that should facilitate clarification of the genetic basis of complex diseases and drug responses. AIA is a distinct entity of asthma triggered by aspirin or NSAIDs, but little is known of its genetic basis. Identification of genetic susceptibilities to AIA might both clarify its molecular mechanism and reveal promising clinical and therapeutic targets.

Overproduction of cys-LTs in bronchial epithelium and inhibition of prostaglandin synthesis by COX inhibition apparently underlie the pathogenesis AIA (17–19). Cowburn *et al.* demonstrated that bronchial biopsies from AIA patients exhibited 4-fold increase in eosinophils compared with specimens from ATA patients, and baseline concentrations of cys-LTs measured in BALF of AIA patients correlate well with counts of inflammatory cells having positive immunoreactivity with LTC<sub>4</sub> synthase in the bronchial mucosa (6). A similar observation in nasal polyp was reported demonstrating that the number of cells expressing cys-LT<sub>1</sub> receptor and the level of cys-LTs in nasal polyp from AIA patients were

significantly higher than those from ATA patients, indicating that overexpression of *cys-LT<sub>1</sub>* receptor is involved in the pathogenesis of aspirin sensitivity (20,21). Considering these results together, we speculate that genetic predisposition directed to the regulation of *LTC<sub>4</sub>* synthase expression may play a key role in the pathogenesis of AIA. Sanak *et al.* reported that a SNP of *LTC<sub>4</sub>* synthase was associated with AIA, and that it functioned to reduce expression of the gene (9,10). The allelic association was not confirmed in Japanese AIA (12), and could not be replicated in the present study with much larger samples. In the current study, we applied an extensive candidate gene approach to identify susceptibility SNPs to AIA. Sixty-three candidate genes were selected on the basis of knowledge of the pharmacological action of aspirin and the plausible factors involving asthma (Table 1). SNPs in the *EP2* gene were screened through an extensive two rounds of association studies of the 370 selected SNPs. *EP2* is a receptor for *PGE<sub>2</sub>*, the well-known inhibitory mediator of inflammation released from mast cells, eosinophils and macrophages that acts as a 'brake' on the inflammatory process and thus has a broncho-protective role in the airways, in part by inhibiting the release of chemoattractants such as *LTB<sub>4</sub>* from alveolar macrophages and airway epithelium and the production of *LTC<sub>4</sub>* in eosinophils (22). *PGE<sub>2</sub>* likely modulates airway tone by inhibiting acetylcholine release of cholinergic nerve endings and mast cell histamine release. More importantly, pre-inhalation of exogenous *PGE<sub>2</sub>* has shown that *PGE<sub>2</sub>* directly suppresses aspirin-induced *LT* synthesis, most likely from eosinophils and mast cells infiltrating the bronchial mucosa (23). The ability of endogenous and exogenous *PGE<sub>2</sub>* to suppress *LTC<sub>4</sub>* synthesis also has been found *in vitro* in human eosinophils and other cells (24). Thus, *PGE<sub>2</sub>* may well act to reduce *LT* synthesis via *EP2* receptors on airway leukocytes. At least four subtypes of *PGE<sub>2</sub>* receptor (*EPs* 1-4), which differ in tissue distribution, ligand-binding affinity and coupling to intracellular signaling pathways, have been cloned to date (25). Although a specific role in blood pressure control was demonstrated in mice lacking *EP2* (26,27), involvement in the asthmatic phenotype of *EP2* was not known.

The allele frequency of *uS5* of the *EP2* gene in AIA patients was quite different from the frequency both in controls and ATA patients [31.3% (AIA) versus 22.3% (CTR) and versus 21.7% (ATA)] (Table 2). The haplotype *m/m/m/M/M/M*, containing *uS5*, was most significantly associated with AIA (permutation *P* = 0.0012) (Table 3). *uS5* locates in the 5'-upstream of the gene on the STAT-binding motif, the allele likely having impact on transcriptional activity. The 41 bp sequence centered by either G or A allele of *uS5* was sub-cloned into upstream of the SV40 promoter reporter vector. *In vitro* reporter assay demonstrated stronger transcription repression with A allele of *uS5*, which is associated with AIA. Despite the site being consensus for STAT binding (G allele of *uS5*), STAT1 protein did not bind to the sequence; instead, an unknown nuclear factor, presumably a negative regulator, bound particularly to the A allele sequence. Considered together, these data suggest that the low level of *EP2* gene expression caused by the *uS5* allele could lead to a low response to *PGE<sub>2</sub>*, skewed *LT* activation and bronchoconstriction in response to numerous stimuli, thereby influencing

individual susceptibility to AIA. Consistent with the finding that *uS5* allele leads to quantitative differences, the homozygous carriers for A allele of *uS5* showed the highest odds ratio (OR = 3.21, 95% C.I. = 1.53–6.75). A modest but persistent failure in the *PGE<sub>2</sub>* braking mechanism together with increased sensitivity to NSAIDs has been postulated to explain why AIA patients overproduce *cyc-LTs* even without ingestion of NSAIDs or after low doses of NSAIDs. Our hypothesis is consistent with the cyclooxygenase theory in suggesting that a persistent failure of the suppressive activity of *PGE<sub>2</sub>* in AIA patients allows over-activity of the *LT* and other pathways, both after NSAID exposure and chronically. Thus, the impaired suppressive activity of *PGE<sub>2</sub>* in at least some AIA patients may be related to reduced expression of *EP2* receptors due to the polymorphic allele *uS5*, the transcription of which is reduced by an unidentified repressor protein.

In conclusion, genetic screening of a candidate gene for AIA suggests that variants in the promoter of the *EP2* gene are significantly associated with AIA, and are functional by reducing transcriptional activity of the *EP2* gene. The functional analysis constitutes only *in vitro* evidence, so further investigation is required. In addition, this study is preliminary in that it included only Japanese individuals.

## MATERIALS AND METHODS

### Subjects

Diagnosis of AIA was made on the basis of self-reported history of more than one episode of moderate to severe asthmatic reaction after aspirin or other NSAID ingestion that had been identified by a physician. The oral provocation test was not performed in most patients because of the theoretical risk and the very low likelihood of significant occult disease. (28). ATA was defined as adult asthma diagnosed by expert physicians according to the American Thoracic Society criteria (29) and no history of aspirin or NSAID-induced asthmatic attack. The controls were outpatients with diseases other than asthma and who self-reported no history of aspirin sensitivity. The 198 unrelated individuals with AIA (age:  $54.7 \pm 13.2$  years; 63 males/135 females), 282 with ATA (age:  $56.0 \pm 16.1$  years; 132 males/150 females) and 274 non-asthmatic controls (CTR) (age:  $50.3 \pm 24.6$  years; 111 males/163 females) were recruited at Niigata University Hospital, University of Tokyo Hospital, Nagoya University Hospital, Doai Memorial Hospital and Kyushu University Hospital. ATA included 154 AT (age:  $48.0 \pm 15.6$  years; 80 male/74 female) subjects and 128 NAT (age:  $65.9 \pm 10.0$  years; 52 male/76 female) subjects who were genotyped. The patients and controls were all of Japanese ethnicity. Although the Japanese population is considered genetically homogenous, similar numbers of patients and controls from the various locations were used to avoid possible geographical differences in allelic frequencies. For the first screening, 87 randomly selected patients with AIA, 192 patients with ATA and 96 controls were genotyped. All the subjects gave written, informed consent and the study was performed with the approval of the Ethical Committee of Tokyo University. Blood samples of each subject were collected for isolation of genomic DNA.

### Selection of SNPs for association study

SNPs were obtained from the two public databases; NCBI dbSNP (<http://www.ncbi.nlm.nih.gov/SNP/>) and IMS-JST JSNP DATABASE (<http://snp.ims.u-tokyo.ac.jp/>). Additional gene-based SNPs were identified by direct sequencing to cover each gene within a 3 kb SNP-interval. Ninety-six control subjects were genotyped for each SNP and SNPs with minor allele frequencies greater than 0.1 were subjected to further analysis. SNPs in the coding region that might affect gene function were given priority regardless of the allele frequencies. The 833 SNPs of 63 genes were validated and the 370 SNPs then were used for the subsequent study, according to the criteria. Direct sequencing was first performed on the *EP2* gene, and 77 SNPs identified were validated; 24 SNPs then were selected and used in the association study.

### SNP genotyping

SNPs were genotyped using either the pyrosequencing method on a PSQ96 Instrument (Pyrosequencing AB, Uppsala, Sweden) or direct sequencing using BigDye Terminator cycle sequencing on an ABI PRISM 3700 DNA analyzer (Applied Biosystems, Tokyo, Japan). PCR was performed with a standard protocol except a biotin-labeled primer was used when the pyrosequencing method was applied.

### Statistical analysis

Differences in allelic frequencies were evaluated by case-control design with chi-square test. Haplotype frequencies for multiple loci were estimated using the expectation-maximization method with SNPalyze v3.0 software (DYNACOM, Mobara, Japan). In addition, the permutation test was performed to test deviation of allelic frequencies of SNPs and haplotypes of the *EP2* gene (30). Distribution of a test statistic was estimated by evaluating the statistics for a random sampling of 10 000 iterated permutations at fixing the total numbers of both the cases and controls, which is incorporated in SNPalyze v3.0 software. *P*-value is estimated by the proportion of permutations for which the permuted data test statistic ( $P_{\text{permuted}}$ ) is greater than the initially observed test statistic ( $P_{\text{observed}}$ ), so permutation  $P = P(P_{\text{observed}} > P_{\text{permuted}})$ .

Pair-wise LD was estimated as  $D = x_{11} - p_1q_1$ , where  $x_{11}$  is the frequency of haplotype  $A_1B_1$ , and  $p_1$  and  $q_1$  are the frequencies of alleles  $A_1$  and  $B_1$  at loci A and B, respectively. A standardized LD coefficient,  $r$ , is given by  $D/(p_1p_2q_1q_2)^{1/2}$ , where  $p_2$  and  $q_2$  are the frequencies of the other alleles at loci A and B, respectively (31). Lewontin's coefficient,  $D'$ , is given by  $D'/D_{\text{max}}$ , where  $D_{\text{max}} = \min(p_1q_2, p_2q_1)$  when  $D < 0$  or  $D_{\text{max}} = \min(p_1q_1, p_2q_2)$  when  $D > 0$  (32).

### UPGMA-based LD tree

LD according to  $r^2$ -statistics was visualized by an 'LD tree' constructed on the basis of the UPGMA method of Neighbor program from the PHYLIP package v3.57c, available at web site (<http://evolution.gs.washington.edu/phyip.html>).  $(1 - r^2)$  was calculated and converted to a distance matrix. Calculated

coefficients were within 0–1, and the smaller values represent high LD against uncalculated coefficients.

### Transcription regulatory motif

The computer program TFSEARCH based on TRANSFAC databases, available at web site (<http://www.cbrc.jp/research/db/TFSEARCH.html>), was used to predict potential binding sites of transcription factors in the regulatory region.

### Transfection and reporter assays

The complementary oligonucleotide spanning the uS5 promoter allelic sequence, 5'-CCAGTTTTGCCACAAAGCTTCT (G/A)GAATCAAGAGCAACATGC-3' or 5'-TCGAGCATG TTGCTCTTGATTC(C/T)AAGAAGCTTTGTGGCAAACT GGGTAC-3', was annealed and ligated into the *KpnI/XhoI*-digested pGL3-promoter vector (Promega, Tokyo, Japan), and sequenced. HCT116 cells were cultured in McCoy's 5A medium supplemented with antibiotics and 10% fetal bovine serum. HCT116 cells were transfected with FuGENE6 (Roche Diagnostics, Tokyo, Japan) according to the manufacturer's instructions. Briefly, 200 ng of firefly luciferase reporter plasmid, and 0.6 ng of *Renilla* luciferase reporter plasmid (pRL-TK, Promega) per 24-well dish were used for each transfection. The cells were harvested 48 h after the transfection, and luciferase assay using the Dual-Luciferase Reporter Assay System was performed in accordance with the manufacturer's protocol (Promega). Experiments were performed at least twice in triplicate, and the relative activities of luciferase were expressed as mean  $\pm$  S.E, after normalizing with the *Renilla* luciferase activities.

The total RNA was extracted using Trizol reagent (Invitrogen, Tokyo, Japan) and RT-PCR was performed with the SuperScript One-Step RT-PCR system (Invitrogen) based on the manufacturer's protocol.

### Electrophoretic mobility shift assay

EMSA was performed with a DIG Gel Shift Kit (Roche Diagnostics) using digoxigenin (DIG)-labeled double-stranded 19 mer oligonucleotides specific to A allele (*EP2*-A19) and G allele (*EP2*-G19) of uS5. DIG-labeled probe was incubated with HeLa nuclear extracts (Promega) for 30 min at 4°C and separated by electrophoresis on a 5% non-denaturing polyacrylamide gel with 0.5× TBE running buffer. DNA-protein complexes were electroblotted onto nylon membrane and the band shift was visualized according to the user's manual for DIG Gel Shift Kit. For the competition assay, we incubated HeLa nuclear extracts with non-labeled competitors for 15 min at 4°C before incubation with labeled *EP2*-A19.

### ACKNOWLEDGEMENTS

We thank DNA donors and supporting medical staff for making this study possible. We are grateful to K. Eguchi, E. Nakamura, Y. Miwa, Y. Sakamoto and Y. Terada for their technical assistance. The critical reading of the manuscript by Dr A. Tajima is gratefully acknowledged. This

work was supported by a Research for the Future Program Grant of The Japan Society for the Promotion of Science (II).

## REFERENCES

1. Szczeklik, A. and Stevenson, D.D. (1999) Aspirin-induced asthma: advances in pathogenesis, diagnosis and management. *J. Allergy Clin. Immunol.*, **104**, 5–13.
2. Picado, C. (2002) Aspirin-intolerant asthma: role of cyclo-oxygenase enzymes. *Allergy*, **S72**, 58–60.
3. Sampson, A., Holgate, S., Austen, K.F. and Szczeklik, A. (1998) Cyclo-oxygenase. *Thorax*, **53**, 719–720.
4. Szczeklik, A., Sanak, M., Nizankowska-Mogilnicka, E. and Kielbasa, B. (2004) Aspirin intolerance and the cyclooxygenase-leukotriene pathways. *Curr. Opin. Pulm. Med.*, **10**, 51–56.
5. Pierzchalska, M., Szabo, Z., Sanak, M., Soja, J. and Szczeklik, A. (2003) Deficient prostaglandin E<sub>2</sub> production by bronchial fibroblasts of asthmatic patients, with special reference to aspirin-induced asthma. *J. Allergy Clin. Immunol.*, **111**, 1041–1048.
6. Cowburn, A.S., Sladek, K., Soja, J., Adamek, L., Nizankowska, E., Szczeklik, A., Lam, B.K., Penrose, J.F., Austen, F.K., Holgate, S.T. *et al.* (1998) Overexpression of leukotriene C<sub>4</sub> synthase in bronchial biopsies from patients with aspirin-intolerant asthma. *J. Clin. Invest.*, **101**, 834–846.
7. Lam, B.K. and Frank Austen, K. (2000) Leukotriene C<sub>4</sub> synthase. A pivotal enzyme in the biosynthesis of the cysteinyl leukotrienes. *Am. J. Respir. Crit. Care Med.*, **161**, S16–S19.
8. Szczeklik, A., Nizankowska, E. and Duplaga, M. (2000) Natural history of aspirin-induced asthma. AIANE Investigators. European Network on Aspirin-Induced Asthma. *Eur. Respir. J.*, **16**, 432–436.
9. Sanak, M., Simon, H.U. and Szczeklik, A. (1997) Leukotriene C<sub>4</sub> synthase promoter polymorphism and risk of aspirin-induced asthma. *Lancet*, **350**, 1599–1600.
10. Sanak, M., Pierzchalska, M., Bazan-Socha, S. and Szczeklik, A. (2000) Enhanced expression of the leukotriene C<sub>4</sub> synthase due to overactive transcription of an allelic variant associated with aspirin-intolerant asthma. *Am. J. Respir. Cell Mol. Biol.*, **23**, 290–296.
11. Van Sambeek, R., Stevenson, D.D., Baldasaro, M., Lam, B.K., Zhao, J., Yoshida, S., Yandora, C., Drazen, J.M. and Penrose, J.F. (2000) 5' Flanking region polymorphism of the gene encoding leukotriene C<sub>4</sub> synthase does not correlate with the aspirin-intolerant asthma phenotype in the United States. *J. Allergy Clin. Immunol.*, **106**, 72–76.
12. Kawagishi, Y., Mita, H., Taniguchi, M., Maruyama, M., Oosaki, R., Higashi, N., Kashii, T., Kobayashi, M. and Akiyama, K. (2002) Leukotriene C<sub>4</sub> synthase promoter polymorphism in Japanese patients with aspirin-induced asthma. *J. Allergy Clin. Immunol.*, **109**, 936–942.
13. Choi, J.H., Park, H.S., Oh, H.B., Lee, J.H., Suh, Y.J., Park, C.S. and Shin, H.D. (2004) Leukotriene-related gene polymorphisms in ASA-intolerant asthma: an association with a haplotype of 5-lipoxygenase. *Hum. Genet.*, **114**, 337–344.
14. Nei, M. and Kumar, S. (2000) *Molecular Evolution and Phylogenetics*. Oxford University Press, New York.
15. Heinemeyer, T., Wingender, E., Reuter, I., Hermjakob, H., Kel, A.E., Kel, O.V., Ignatieva, E.V., Ananko, E.A., Podkolodnaya, O.A., Kolpakov, F.A. *et al.* (1998) Databases on transcriptional regulation: TRANSFAC, TRRD and COMPEL. *Nucl. Acids Res.*, **26**, 362–367.
16. Kotanides, H. and Reich, N.C. (1996) Interleukin-4-induced STAT6 recognizes and activates a target site in the promoter of the interleukin-4 receptor gene. *J. Biol. Chem.*, **271**, 25555–25561.
17. Sampson, A.P., Cowburn, A.S., Sladek, K., Adamek, L., Nizankowska, E., Szczeklik, A., Lam, B.K., Penrose, J.F., Austen, K.F. and Holgate, S.T. (1997) Profound overexpression of leukotriene C<sub>4</sub> synthase in bronchial biopsies from aspirin-intolerant asthmatic patients. *Int. Arch. Allergy Immunol.*, **113**, 355–357.
18. Pierzchalska, M., Mastalerz, L., Sanak, M., Zazula, M. and Szczeklik, A. (2000) A moderate and unspecific release of cysteinyl leukotrienes by aspirin from peripheral blood leucocytes precludes its value for aspirin sensitivity testing in asthma. *Clin. Exp. Allergy*, **30**, 1785–1791.
19. Antczak, A., Montuschi, P., Kharitonov, S., Gorski, P. and Barnes, P.J. (2002) Increased exhaled cysteinyl-leukotrienes and 8-isoprostane in aspirin-induced asthma. *Am. J. Respir. Crit. Care Med.*, **166**, 301–306.
20. Sousa, A.R., Parikh, A., Scadding, G., Corrigan, C.J. and Lee, T.H. (2002) Leukotriene-receptor expression on nasal mucosal inflammatory cells in aspirin-sensitive rhinosinusitis. *N. Engl. J. Med.*, **347**, 1493–1499.
21. Steinke, J.W., Bradley, D., Arango, P., Crouse, C.D., Frierson, H., Kountakis, S.E., Kraft, M. and Borish, L. (2003) Cysteinyl leukotriene expression in chronic hyperplastic sinusitis-nasal polypsis: importance to eosinophilia and asthma. *J. Allergy Clin. Immunol.*, **111**, 342–349.
22. Celik, G., Bavbek, S., Misirligil, Z. and Melli, M. (2001) Release of cysteinyl leukotrienes with aspirin stimulation and the effect of prostaglandin E<sub>2</sub> on this release from peripheral blood leucocytes in aspirin-induced asthmatic patients. *Clin. Exp. Allergy*, **31**, 1615–1622.
23. Sestini, P., Armetti, L., Gambaro, G., Pieroni, M.G., Refini, R.M., Sala, A., Vaghi, A., Folco, G.C., Bianco, S. and Robuschi, M. (1996) Inhaled PGE<sub>2</sub> prevents aspirin-induced bronchoconstriction and urinary LTE<sub>4</sub> excretion in aspirin-sensitive asthma. *Am. J. Respir. Crit. Care Med.*, **153**, 572–575.
24. Tenor, H., Hatzelmann, A., Church, M.K., Schudt, C. and Shute, J.K. (1996) Effects of theophylline and rolipram on leukotriene C<sub>4</sub> (LTC<sub>4</sub>) synthesis and chemotaxis of human eosinophils from normal and atopic subjects. *Br. J. Pharmacol.*, **118**, 1727–1735.
25. Coleman, R.A., Smith, W.L. and Narumiya, S. (1994) International Union of Pharmacology classification of prostanoid receptors: properties, distribution and structure of the receptors and their subtypes. *Pharmacol. Rev.*, **46**, 205–229.
26. Kennedy, C.R., Zhang, Y., Brandon, S., Guan, Y., Coffee, K., Funk, C.D., Magnuson, M.A., Oates, J.A., Breyer, M.D. and Breyer, R.M. (1999) Salt-sensitive hypertension and reduced fertility in mice lacking the prostaglandin EP<sub>2</sub> receptor. *Nat. Med.*, **5**, 217–220.
27. Tilley, S.L., Audoly, L.P., Hicks, E.H., Kim, H.S., Flannery, P.J., Coffman, T.M. and Koller, B.H. (1999) Reproductive failure and reduced blood pressure in mice lacking the EP<sub>2</sub> prostaglandin E<sub>2</sub> receptor. *J. Clin. Invest.*, **103**, 1539–1545.
28. Jenkins, C., Costello, J. and Hodge, L. (2004) Systematic review of prevalence of aspirin induced asthma and its implications for clinical practice. *BMJ*, **328**, 434.
29. National Heart, Lung and Blood Institute (1991) Guidelines for the diagnosis and management of asthma. National Heart, Lung, Blood Institute. National Asthma Education Program. Expert panel report. *J. Allergy Clin. Immunol.*, **88**, 425–534.
30. Zhao, J.H., Curtis, D. and Sham, P.C. (2000) Model-free analysis and permutation tests for allelic associations. *Hum. Hered.*, **50**, 133–139.
31. Hill, W.G. and Robertson, A. (1968) Linkage disequilibrium in finite populations. *Theor. Appl. Genet.*, **38**, 226–231.
32. Lewontin, R.C. (1964) The interaction of selection and linkage. I. General considerations; Heterotic models. *Genetics*, **49**, 49–67.
